# The *Spitzer* South Pole Telescope Deep-Field Survey: linking galaxies and haloes at $z = 1.5$

Jesus Martinez-Manso,<sup>1\*</sup> Anthony H. Gonzalez,<sup>1</sup> Matthew L. N. Ashby,<sup>2</sup>  
S. A. Stanford,<sup>3</sup> Mark Brodwin,<sup>4</sup> Gilbert P. Holder<sup>5</sup> and Daniel Stern<sup>6</sup>

<sup>1</sup>Department of Astronomy, University of Florida, Gainesville, FL 32611, USA

<sup>2</sup>Harvard-Smithsonian Center for Astrophysics, 60 Garden St., Cambridge, MA 02138, USA

<sup>3</sup>Department of Physics, University of California, One Shields Avenue, Davis, CA 95616, USA

<sup>4</sup>Department of Physics and Astronomy, University of Missouri, Kansas City, MO 64110, USA

<sup>5</sup>Department of Physics, McGill University, Montreal, Quebec H3A 2T8, Canada

<sup>6</sup>Jet Propulsion Laboratory, California Institute of Technology, 4800 Oak Grove Drive, Mail Stop 169-221, Pasadena, CA 91109, USA

Accepted 2014 September 24. Received 2014 August 31; in original form 2013 December 12

## ABSTRACT

We present an analysis of the clustering of high-redshift galaxies in the recently completed 94 deg<sup>2</sup> *Spitzer* South Pole Telescope Deep-Field survey. Applying flux and colour cuts to the mid-infrared photometry efficiently selects galaxies at  $z \sim 1.5$  in the stellar mass range  $10^{10}$ – $10^{11} M_{\odot}$ , making this sample the largest used so far to study such a distant population. We measure the angular correlation function in different flux-limited samples at scales  $>6$  arcsec (corresponding to physical distances  $>0.05$  Mpc) and thereby map the one- and two-halo contributions to the clustering. We fit halo occupation distributions and determine how the central galaxy’s stellar mass and satellite occupation depend on the halo mass. We measure a prominent peak in the stellar-to-halo mass ratio at a halo mass of  $\log(M_{\text{halo}}/M_{\odot}) = 12.44 \pm 0.08$ , 4.5 times higher than the  $z = 0$  value. This supports the idea of an evolving mass threshold above which star formation is quenched. We estimate the large-scale bias in the range  $b_g = 2$ – $4$  and the satellite fraction to be  $f_{\text{sat}} \sim 0.2$ , showing a clear evolution compared to  $z = 0$ . We also find that, above a given stellar mass limit, the fraction of galaxies that are in similar mass pairs is higher at  $z = 1.5$  than at  $z = 0$ . In addition, we measure that this fraction mildly increases with the stellar mass limit at  $z = 1.5$ , which is the opposite of the behaviour seen at low redshift.

**Key words:** galaxies: evolution – galaxies: haloes – galaxies: high-redshift – cosmology: observations – large-scale structure of Universe.

## 1 INTRODUCTION

Many observational studies have measured dark matter halo masses in order to find correlations with the properties of the galaxies they host. Various works have utilized gravitational lensing of background objects (Mandelbaum et al. 2006; Gavazzi et al. 2007; Bolton et al. 2008; Cacciato et al. 2009, 2013; Auger et al. 2010; Velander, Kuijken & Schrabback 2011), virial temperatures derived from X-rays (Lin, Mohr & Stanford 2003; Lin & Mohr 2004; Peterson & Fabian 2006; Hansen et al. 2009) and dynamics of satellites (More et al. 2009, 2011). These methods have achieved high accuracy, but are also observationally expensive to carry out on large samples and for small haloes, which limits the statistical strength and range of application. A less direct but more compre-

hensive method of linking galaxies to haloes is abundance matching (Conroy, Wechsler & Kravtsov 2006; Vale & Ostriker 2006; Behroozi, Conroy & Wechsler 2010; Guo et al. 2010; Moster et al. 2010; Moster, Naab & White 2013), which uses the merger trees from  $N$ -body dark matter simulations as input and assumes that the halo mass is the main determinant of galaxy luminosity and stellar mass. The basic idea is to cumulatively match observed galaxy luminosity functions and halo mass functions by placing progressively less luminous galaxies in less massive haloes. By design, this method reproduces the luminosity (or stellar mass) function, and is able to predict the clustering of galaxies in many cases (Conroy et al. 2006; Conroy & Wechsler 2009; Moster et al. 2010).

Direct measurements of galaxy clustering are another powerful ways to connect galaxies with the underlying dark matter distribution. As a function of physical separation  $r$ , clustering is commonly measured in the form of the two-point spatial correlation function  $\xi(r)$  (SCF; Peebles 1980). The relation between the distributions of

\*E-mail: j.martinez.manso@gmail.com

galaxies and dark matter can be parametrized through the galaxy bias  $b_g$  (Kaiser 1984; Coles 1993; Fry & Gaztanaga 1993; Mo & White 1996; Kauffmann, Nusser & Steinmetz 1997; Sheth & Tormen 1999; Tinker et al. 2005, 2010), which is given by the scaling between the SCFs of these two fields:

$$\xi_g(r, z) = \xi_m(r, z) b_g^2(r, z). \quad (1)$$

The SCF of dark matter depends on the cosmology, and can be prescribed analytically given those parameters (Eisenstein & Hu 1999; Smith et al. 2003). Thus, the bias of a galaxy sample is directly determined by its SCF. In general, the bias depends on the spatial scale and redshift (Fry 1996; Moscardini et al. 1998; Tinker et al. 2005; Moster et al. 2010), since galaxies and dark matter do not evolve in the exact same manner in time or space. The measurement of  $b_g(r, z)$  can therefore reveal a precise description of the connection between galaxies and dark matter.

Many studies up to intermediate redshifts ( $z < 1$ ) have investigated galaxy clustering with samples selected in different ways (Phleps et al. 2006; Zheng, Coil & Zehavi 2007; Blake, Collister & Lahav 2008; Brown et al. 2008; Coil et al. 2008; McCracken et al. 2008; Meneux et al. 2008, 2009; Simon et al. 2009; Abbas et al. 2010; Foucaud et al. 2010; Ross, Percival & Brunner 2010; Matsuoka et al. 2011; Wake et al. 2011; Zehavi et al. 2011; Jullo et al. 2012; Leauthaud et al. 2012; de la Torre et al. 2013; Hartley et al. 2013; Mostek et al. 2013; Donoso et al. 2014). The most common conclusion is that clustering strength is correlated with luminosity, red colour and morphology (towards early type). Galaxies on the extreme of these properties are highly biased and therefore they live in massive haloes.

These conclusions can be obtained just by analysing the overall amplitude of the bias. However, the precise form of this observable as a function of spatial separation contains more information about the inner structure of the haloes. The halo occupation distribution (HOD) is a simple parametric framework to accurately model the bias (Ma & Fry 2000; Peacock & Smith 2000; Seljak 2000; Scoccimarro et al. 2001; Berlind & Weinberg 2002; Cooray & Sheth 2002; Berlind et al. 2003; Kravtsov et al. 2004; Zheng et al. 2005). It considers galaxies to be either centrals or satellites, and the number of these that a halo can host is fully determined by the halo mass.

One of the advantages of the HOD framework is that its parameters have a clear physical meaning, and thus when fitting the clustering one can gain a deeper insight into the connection between the galaxies and their host haloes. For example, the HOD framework can directly relate the average stellar mass of the central galaxies to a particular halo mass. As shown in many studies at  $z = 0-1$ , the ratio of these masses is highest around a halo mass of  $\sim 10^{12} M_\odot$  (Zheng et al. 2007; Leauthaud et al. 2012; Yang et al. 2012; Zehavi, Patiri & Zheng 2012; Behroozi, Wechsler & Conroy 2013; Moster et al. 2013; Reddick et al. 2013; Wang et al. 2013). This implies that there is a characteristic halo mass where galaxy formation has been more efficient. The qualitative explanation for this is that at low halo masses the gravitational potential is not deep enough to halt the expulsion of gas due to stellar winds (Benson et al. 2003), while high-mass haloes have heated up the intrahalo medium by gravitational heating and active galactic nuclei (AGN) feedback (Bower et al. 2006; Croton et al. 2006; van de Voort et al. 2011a) so that infalling gas gets heavily shocked and cannot easily cool and condense (Birnboim & Dekel 2003; Dekel & Birnboim 2006; Kereš et al. 2005, 2009). These two trends can be reduced to a comparison between dynamical and gas cooling times in haloes, such that  $\tau_{\text{dyn}} \gg \tau_{\text{cool}}$  for low masses and  $\tau_{\text{dyn}} \ll \tau_{\text{cool}}$  for high

masses. A possible consequence is that the peak halo mass  $M_{\text{peak}}$  is related to a characteristic quenching mass  $M_q$  that sets  $\tau_{\text{dyn}} \sim \tau_{\text{cool}}$  (Neistein, van den Bosch & Dekel 2006) and marks a transition between star-forming and quenched haloes. Indeed, massive red galaxies with little star formation have been shown to live in massive haloes (Coil et al. 2008; Zehavi et al. 2011), supporting the idea of the red sequence of galaxies arising when they become quenched (Bower et al. 2006; Croton et al. 2006). This blue/red dichotomy is present in the nearby Universe (Kauffmann et al. 2003, 2004; Baldry et al. 2004), and starts its build-up around  $z \sim 2$  (Bell et al. 2004; Cooper et al. 2006; Muzzin et al. 2013a; Wang et al. 2013). Thus, when haloes become large enough, they quench their star formation. A consequence of this is that the most massive galaxies today have no significant ongoing star formation. This effect has been called archeological downsizing (Cowie et al. 1996; Juneau et al. 2005; Conroy & Wechsler 2009), and is also inferred from the lack of evolution in the massive end of the stellar mass function (Pérez-González et al. 2008; Marchesini et al. 2009; Muzzin et al. 2013a). HOD models have shown that the stellar-to-halo mass ratio (SHMR) evolves in the sense that the peak moves to lower halo masses with increasing time, at least since  $z \sim 1$  (Coupon et al. 2012; Leauthaud et al. 2012). This trend has been predicted to persist up to  $z = 2$  by extensions of HOD that use conditional stellar mass functions (Yang, Mo & van den Bosch 2003; Yang et al. 2012; Wang et al. 2013) and abundance-matching studies (Behroozi et al. 2013; Moster et al. 2013). A possible mechanism for this would involve evolution in  $M_q$ , which is supported by the idea that the universal gas fraction drops with time and therefore star formation becomes more difficult with time at fixed halo mass (van de Voort et al. 2011a,b). However, this is still a matter of debate (Conroy & Ostriker 2008; Tinker & Wetzel 2010). For instance, Leauthaud et al. (2012) present evidence in favour of this evolution being set by quenching below a critical galaxy-halo mass ratio instead of a critical halo mass. Such a mechanism would also shift the SHMR towards lower masses with time.

We have described the basic processes that can determine  $M_{\text{peak}}$ , based on the comparison of  $\tau_{\text{dyn}}$  and  $\tau_{\text{cool}}$  as a function of halo mass. This basic model can be extended to include modes of galactic outflows, which are then directly constrained by the observed slope of the SHMR. The stellar mass growth of a galaxy is heavily regulated by the expulsion of gas, which could be mainly sourced by supernovae feedback (Murray, Quataert & Thompson 2005). The stellar mass-loss rate,  $\dot{M}_*$ , can be broken down in two contributions: pressure-supported energy injection (energy-driven winds) and coherent momentum transfer (momentum-driven winds). The energy and momentum deposition rates,  $\dot{E}$  and  $\dot{P}$ , can be related from first principles to the mass via a proxy of the kinetic velocity field,  $\sigma_w$ :  $\dot{M}_* \propto \dot{E}/\sigma_w^2$  and  $\dot{M}_* \propto \dot{P}/\sigma_w$ . This suggests that galaxies with low velocity fields, and therefore low masses, may have their outflows dominated by energy-driven winds (Dutton & van den Bosch 2009). Thus, a larger contribution from this type of wind would result in a steeper low-mass slope of the SHMR.

At high masses (and high  $\sigma_w$ ), these arguments would point to a dominance of momentum-driven winds. However, the winds in this regime are also sourced by radiative AGN feedback, which is expected to have a strong contribution (Vogelsberger et al. 2013). In addition, a large merger rate between central galaxies will result in a flattening of the SHMR (Leauthaud et al. 2012). With all these processes at play, the high-mass slope is less straightforward to interpret than the low-mass one, but it can still offer important constraints on this combination of mechanisms.

Galaxy clustering combined with HOD modelling provide particularly solid measurements of the SHMR whenever the selection of galaxies spans the relevant range of stellar masses. At  $z \gtrsim 1.5$ , such measurements have proven to be very difficult given the lack of large volume-limited samples. Wake et al. (2011) use the 0.25 deg<sup>2</sup> NEWFIRM survey (van Dokkum et al. 2009), but the low number statistics made it difficult to map the turnover of the SHMR. In this study, we use a 94 deg<sup>2</sup> mid-infrared (MIR) survey to select galaxies with stellar masses ranging from  $10^{10}$ – $10^{11} M_{\odot}$  and fit an HOD model to the angular correlation function (ACF). We present the most robust measurement to date of the peak of the SHMR at  $z = 1.5$ .

In addition, the HOD yields particularly strong constraints on the satellite population of a given galaxy sample. We determine what fraction of the galaxies are satellites, and how the abundance of these depends on the halo mass. Moreover, we measure a proxy for the occurrence of galaxy pairs of similar mass, and find that it mildly decreases towards high luminosities. Although we do not achieve a robust detection, this represents the opposite trend to what is seen at low redshift. The processes that produce this relationship are strongly tied to the accretion and merger events between galaxies and haloes, as well as the quenching of star formation in satellites.

The paper is organized as follows. In Section 2, we describe all data sets that are used. In Section 3, we describe how we adapt redshift and stellar mass distributions from a reference optical + mid-IR survey. In Section 4, we define the two-point clustering statistic and the method used to compute it. In Section 5, we describe the model that links galaxies to haloes. In Section 6, we explain the fitting procedure of the HOD to the observed clustering. In Sections 7, 8 and 9 we discuss the results obtained regarding the SHMR, the satellite galaxies and the large-scale bias, respectively. We end with a short summary in Section 10. For the reader that is only interested in the results, we recommend reading Sections 7 and beyond.

Additionally, we include several appendices where many of the details are covered. Appendix A presents a calibration of systematic effects in the photometry. Appendix B compares the results obtained from using different reference catalogues to draw redshift and stellar mass distributions. Appendix C calculates the systematic offset in the clustering amplitude due to the geometry of the survey. Appendix D presents the formalism of the halo model. Appendix E investigates the removal of low-redshift sources from the sample using optical data. Appendix F explores different choices of free parameters used in the HOD fits to the clustering.

Throughout this paper we use the following cosmology:  $\Omega_m = 0.27$ ,  $\Omega_{\Lambda} = 0.73$  and  $H_0 = 70 \text{ km s}^{-1} \text{ Mpc}^{-1}$ . All magnitudes are in the Vega system and masses are in units of  $M_{\odot}$ .

## 2 DATA SETS

Our main data set is the *Spitzer* South Pole Telescope Deep-Field Survey (SSDF; Ashby et al. 2013b), a 93.8 deg<sup>2</sup> photometric survey using the infrared array camera (IRAC) 3.6 and 4.5  $\mu\text{m}$  bands (hereafter [3.6] and [4.5]). The mosaics have a nominal integration time of 120 s. We used Source Extractor (SEXTRACTOR; Bertin & Arnouts 1996) in dual image mode, detecting galaxies in [4.5] and extracting the flux from fixed 4 arcsec apertures in both IRAC channels. These aperture fluxes were then corrected to total fluxes using growth curves from isolated point sources found in the mosaics. A detailed description of the survey and a public photometric catalogue are presented in Ashby et al. (2013a). However, here we use a deeper private catalogue and account for faint-end photometric bias and detection completeness (see Appendix ). We determine the

$5\sigma$  limit in [4.5] to be 18.19 mag, in agreement with Ashby et al. (2013a).

We use the near-infrared 2MASS Point Source Catalog (Skrutskie et al. 2006) to identify and remove sources brighter than  $K_s(AB) = 12$  mag, most of which are likely to be stars. In addition, we visually inspected some of these sources in the IRAC mosaics and determined an empirical relation between their  $K_s$ -band magnitude and the maximum radius where their 4.5  $\mu\text{m}$  flux caused a clear suppression in the detection of nearby sources. This relation was then applied to the rest of the  $K_s$ -selected sample and the resulting radii were used to mask all SSDF sources enclosed within from the main catalogue. For reference, the radii corresponding to  $K_s(AB) = 8$  and 12 sources were 41 and 8.4 arcsec, respectively. We also masked out low coverage gaps in the survey, yielding a final effective area of 88.8 deg<sup>2</sup>.

Finally, in order to better understand the redshift distribution of our IRAC-selected sample in the SSDF, we use public catalogues in two other regions of the sky: the COSMOS-UltraVista field (hereafter COSMOS; Muzzin et al. 2013) and the Extended Groth Strip (hereafter EGS; Barro et al. 2011a,b). These two surveys have publicly accessible IRAC photometry, photometric redshifts and stellar masses. In the following section, we describe how we used these catalogues to infer the redshift and mass distributions of SSDF samples.

## 3 CONTROL SAMPLE

This study requires knowledge of the redshift and stellar mass distribution of the SSDF galaxy sample. However, our main data set is too limited to obtain reliable values for these observables. Therefore, the strategy is to import this information from a reference survey that contains optical data and IRAC photometry with a higher accuracy. We consider the catalogues from COSMOS and EGS, which include photometric redshifts and stellar masses. We will adopt COSMOS as the fiducial data set because it is larger and has better statistics, and in Appendix B we show how our results do not change significantly when using EGS instead. The reference catalogue is degraded to become a control sample whose photometric errors match those of the SSDF. Then, applying the same IRAC selection in both SSDF and the control sample allows us to match the derived distributions of redshift and mass. A brief description of the COSMOS photometry can be found in Appendix B.

For every source in the reference catalogue, we have [4.5] mag, [3.6] – [4.5] colours, photometric redshifts and stellar masses. The goal is to infer the SSDF distributions of these parameters by degrading the reference photometry, which is done using the SSDF photometric errors. We calculate the scatter in SSDF magnitudes and colours as a function of these same variables, using the results from the photometric simulations described in Appendix A. These scatter profiles are shown in Fig. 1. At fixed [4.5] mag, the scatter in colour increases for larger colours since these imply fainter [3.6] mag. In the case of the reference sample, since it is 2 mag deeper than SSDF (see Appendix B), we can safely consider its photometric scatter as negligible in comparison.

The degradation of the reference catalogue into a control sample consists of transforming the specific values (e.g. magnitude) of each source in the catalogue into Gaussian probability density functions (PDFs). These PDFs are defined in the parameter space of apparent magnitude [4.5] ( $\mathcal{M}$ ), [3.6] – [4.5] colour ( $\mathcal{C}$ ) and photometric redshift ( $z_{\text{phot}}$ ):  $\mathcal{P}(\mathcal{M}, \mathcal{C}, z_{\text{phot}})$ . The centroids are given by  $\mu_i = (\mathcal{M}^i, \mathcal{C}^i, z_{\text{phot}}^i)$ , which correspond to the parameter vectors of the sources in the reference catalogue. The standard deviations

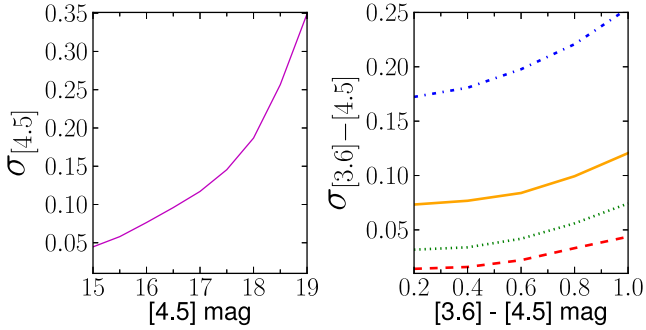

**Figure 1.** Photometric scatter of SSDF sources derived from the simulations in Appendix A. Left: standard deviation in [4.5] mag. There is higher scatter for fainter sources. Right: standard deviation in [3.6]–[4.5] colour (4 arcsec diameter aperture). Dashed, dotted, solid and dash-dotted lines represent fixed [4.5] input magnitudes of 15, 16, 17 and 18, respectively. Larger colours imply fainter [3.6] mag, which is reflected as a mild increase in the scatter.

are  $\sigma_i = (\sigma_{\mathcal{M}}^i, \sigma_{\mathcal{C}}^i, \sigma_{\text{phot}}^i)$ . The first two components in  $\sigma$  are the functions  $\sigma_{\mathcal{M}}(\mathcal{M})$  and  $\sigma_{\mathcal{C}}(\mathcal{C})$ , which are shown by the curves in Fig. 1. The redshift component does not have a counterpart in the SSDF catalogue, but we apply a variable redshift smoothing kernel equivalent to 100 comoving Mpc, in order to filter the effect of large-scale structure. This amounts to  $\sigma_{\text{phot}} = 0.02\text{--}0.1$  within our redshift range. However, we find that this redshift filtering has a minimal effect in the results, varying the  $z = 1.5$  clustering amplitude and galaxy number density at the  $\sim 1$  per cent level.

### 3.1 Main redshift distribution

If we consider galaxies with apparent magnitudes within some bracket  $\Delta\mathcal{M}$ , we can compute the distribution in colour and redshift space  $\mathcal{K}(\mathcal{C}, z)$  of the control sample:

$$\mathcal{K}(\mathcal{C}, z) = \frac{1}{N_{\text{ref}}} \sum_{j=1}^{N_{\text{ref}}} \int_{\Delta\mathcal{M}} dm \mathcal{P}(m, \mathcal{C}, z; \mu_j, \sigma_j). \quad (2)$$

Here, we have marginalized each individual PDF over  $\Delta\mathcal{M}$  and summed them in the resulting space of  $(\mathcal{C}, z_{\text{phot}})$ , using the reference catalogue (subscript ‘ref’). A similar procedure to derive full redshift distributions based on the Bayesian combination of individual redshift likelihood functions was performed by Brodwin et al. (2006a,b). The normalization of  $\mathcal{K}(\mathcal{C}, z)$  is the total number of sources in the reference catalogue,  $N_{\text{ref}}$ . Fig. 2 shows the application of equation (2) for  $\Delta\mathcal{M} \rightarrow 15 < [4.5] < 18.6$ , which are the limits for our full SSDF sample (see Section 3.2). The top panel corresponds to the colour versus redshift distribution from the raw reference catalogue. The bottom panel shows the control sample, which is how SSDF sources are expected to be distributed. For comparison, we have also plotted a galaxy evolutionary track for a single stellar population with solar metallicity and formation redshift of  $z_f = 3.5$ , computed using the Bruzual & Charlot (2003) models with Chabrier (2003) initial mass function (IMF).

There is a clear correlation between colour and redshift at  $z > 0.6$ . This occurs because going from  $z = 0.6$  to 2, the IRAC bands map the galaxy spectrum across the stellar bump at rest-frame  $H$  band. This results in a monotonic change in observed colour within  $z = 0.6 - 2$ . An insightful description of this phenomenology can be found in Muzzin et al. (2013b). We can take advantage of this effect to select galaxies in redshift using a colour cut. A lower colour threshold needs to be high enough to reject  $z < 0.3$  galaxies

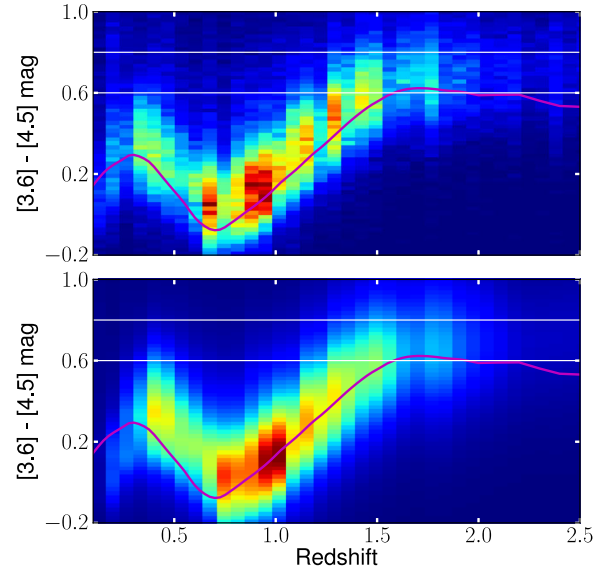

**Figure 2.** [3.6]–[4.5] colour versus redshift for galaxies with  $15 < [4.5] < 18.6$ , based on the COSMOS reference catalogue. The horizontal white lines indicate the colour selection that we apply to our SSDF samples. The purple curve is the evolutionary track of a galaxy formed at  $z_f = 3.5$  using the BC03 model with a Chabrier IMF, shown for comparison. Top: distributions of the raw reference catalogue. Bottom: reference catalogue degraded to match the SSDF photometric properties, derived from equation (2).

(see Fig. 2), while also keeping a number of higher redshift sources that is large enough to measure a robust clustering signal. An upper threshold is also necessary, since very red colours  $[3.6] - [4.5] \sim 1$  are characteristic of AGN (Stern et al. 2005). The best compromise is a colour cut of  $0.6 < [3.6] - [4.5] < 0.8$ , as shown in Fig. 2.

With a given  $\Delta\mathcal{C}$ , we can derive the redshift distribution of sources:

$$\phi(z) = \frac{1}{N_{\text{ref}}} \sum_{j=1}^{N_{\text{ref}}} \int_{\Delta\mathcal{M}} \int_{\Delta\mathcal{C}} dm dc \mathcal{P}(m, c, z; \mu_j, \sigma_j). \quad (3)$$

Note that  $\int \phi(z; \Delta\mathcal{M}, \Delta\mathcal{C}) dz$  is equal to 1 only when  $\Delta\mathcal{M}$  and  $\Delta\mathcal{C}$  represent the full ranges spanned by the reference sources. We denote such distribution as  $\phi_{\text{full}}(z)$ , while the one corresponding to the colour selection  $\Delta\mathcal{C} \rightarrow 0.6 < [3.6] - [4.5] < 0.8$  is denoted as  $\phi_{\text{cut}}(z)$ .

We are assuming that this colour cut selects a representative sample of the  $z > 1$  galaxy population. However, it is important to check whether such a selection is biased towards young or old galaxies. It has been shown that older galaxies exhibit a higher clustering amplitude than their younger counterparts (Skibba et al. 2014, and references therein). In our case, we are tracing a part of the spectral energy distribution that is much less sensitive to star formation history. To illustrate this point, we use the EZGAL package (Mancone & Gonzalez 2012) to compare the [3.6] – [4.5] colours for passive and star-forming galaxies using assorted stellar population models (Bruzual & Charlot 2003; Maraston 2005; Conroy, Gunn & White 2009). For the passive galaxies, we assume a single burst model with formation redshift  $z_f = 3.5$ . For the star-forming galaxies, we run models with exponentially declining star formation, using  $\tau = 1$  Gyr and an initial formation redshift  $z_f = 3.5$ . The difference in [3.6] – [4.5] is  $\lesssim 0.05$ . For the galaxy sample used in our analysis, this difference is comparable to or smaller than the photometric errors (see Fig. 1). Thus, the associated systematic bias due to the



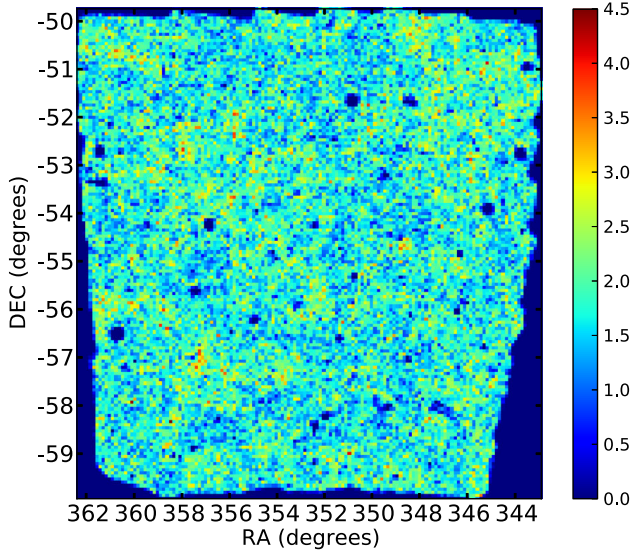

**Figure 3.** Density map of the SSDF field for galaxies in our selected sample:  $0.6 < [3.6] - [4.5] < 0.8$  and  $15 < [4.5] < 18.6$ . This corresponds to a redshift selection around  $z \sim 1.5$ . Units are galaxies per square arcminute. Masking has been applied to bright stars and low coverage gaps, yielding a final size of 88.8 square degrees.

colour selection will be small compared to the photometric errors and intrinsic scatter in galaxy colours, and can be neglected for the current analysis.

### 3.2 Definition of subsamples

Our main science sample of SSDF galaxies is determined by the apparent magnitude and colour cuts of  $15 < [4.5] < 18.6$  and  $0.6 < [3.6] - [4.5] < 0.8$ . The first of these cuts imposes an upper magnitude limit at the 80 per cent completeness level (see Appendix A3), and the second is tuned to select galaxies at high redshift while avoiding AGN. A density map of this selection can be seen in Fig. 3, representing a slice of the Universe at  $z \sim 1.5$ .

We further split the main sample into 13 subsamples, with faint limits over the range  $[4.5] = 16.2 - 18.6$  in steps of 0.2 mag. The bright limit is  $[4.5] = 15$  in all of them. We do this instead of a selection within differential magnitude bins because the halo occupation framework presented in Section 5 requires cumulative samples in order to link halo masses and galaxy masses. We note that this approach carries the drawback of producing a correlation between the different samples. This correlation is strong between neighbouring samples, but not dominant otherwise. Due to the steep variation of the stellar mass function, any given sample is mostly comprised by galaxies close to its low-mass threshold, making their clustering less sensitive to the most massive population (see Matsuoka et al. 2011).

The photometric scatter increases for fainter samples. Thus, we calculate the redshift distribution (see equation 3) for each sample, obtaining sets of  $\phi_{\text{full}}^k, \phi_{\text{cut}}^k$ , where  $k = 1 - 13$  is the sample index (going from brightest to faintest). We can also define the number density completeness as  $f_N^k(z) = \phi_{\text{cut}}^k(z) / \phi_{\text{full}}^k(z)$ , which determines the fraction of galaxies as a function of redshift that the colour cut retains. Fig. 4 shows a comparison of  $\phi_{\text{cut}}, \phi_{\text{full}}$  for  $k = 13$  (the largest sample). At the peak of the colour-cut distribution we have that  $f_N^k \sim 0.3$ , and we will use this factor to scale up and correct the number density (see below). Fig. 5 shows  $\phi_{\text{cut}}^k$  for the smallest and

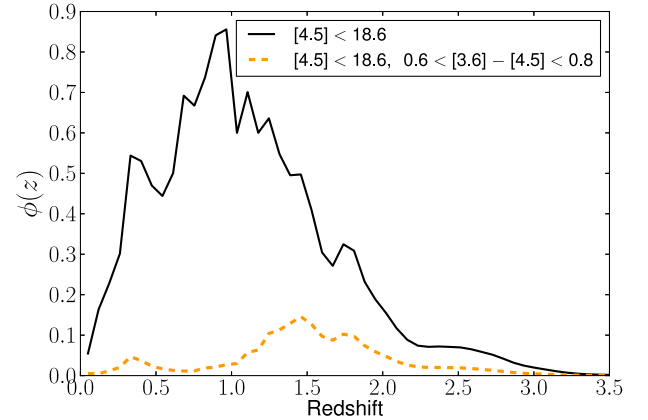

**Figure 4.** Redshift distribution of the COSMOS-based control sample using the faintest selection ( $15 < [4.5] < 18.6$ ,  $k = 13$ ). The dashed lines represent the additional colour-cut selection. The colour cut imposes a selection around  $z \sim 1.5$ , although it only keeps about one third of the total number counts at that redshift.

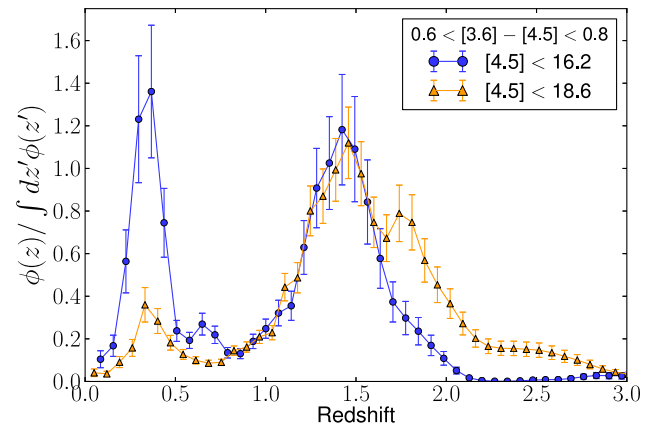

**Figure 5.** Normalized redshift distributions of the COSMOS-based control sample using the faintest ( $15 < [4.5] < 18.6$ , orange triangles) and brightest ( $15 < [4.5] < 16.2$ , blue circles) flux thresholds with the colour cut. Brighter sample thresholds induce a higher contribution of low-redshift sources (see the text).

largest samples (i.e. brighter and fainter thresholds,  $k = 1, 13$ ), where each curve is shown normalized to 1. We also derive cosmic variance errors using the prescriptions from Moster et al. (2011), which are based on analytical predictions of dark matter structure given a particular survey geometry (see also Brodwin et al. 2006a). The peak in these redshift distributions is consistently around  $z = 1.5$  in all samples. In general, the samples consist of a  $z \geq 1$  population that has approximately the same absolute luminosity and stellar mass (see Section 3.3), plus a  $z \sim 0.3$  contribution of ‘contaminant’ galaxies that are intrinsically much less luminous. These contaminants represent 12 per cent (37 per cent) of all galaxies in our full (brightest) sample. When setting a brighter flux threshold, the high-redshift population becomes less dominant since these galaxies are closer to the turnover of the luminosity function. The consequence of this is the clear trend where brighter samples have a stronger low-redshift bump. The contribution of the latter to the clustering is modelled in the following sections. Alternatively, we show in Appendix E that our results remain unchanged if instead we employ shallow optical data to remove most of the low-redshift sources.

**Table 1.** Sample properties and HOD fits. Column 1: upper limiting magnitude for each sample. The lower limit is fixed at 15 mag. Column 2: total number of observed SSDF sources, corrected for completeness. Column 3: estimated fraction between observed and true number of sources at  $z_p$ . Column 4: number density at  $z_p$ , corrected by  $f_N$ . Units are  $10^{-4} \text{Mpc}^{-3}$ . Errors are derived by the method of Moster et al. (2011). Columns 5 and 6: median stellar masses of  $z = z_p$  galaxies at and above the flux limit of the sample, respectively. Columns 7–11: parameters from the HOD fits.  $M'_1$  are best-fitting values, the rest are derived parameters. The reduced  $\chi^2$  is given by  $\chi_v^2 = \chi^2/(28 - 1)$ . Since  $\alpha = 1$ , one can directly compute  $M_1 = M'_1 + M_0$ , with  $\log M_0 = 0.76 \log M'_1 + 2.3$ .

| [4.5] limit | $N_{\text{obs}}$ | $f_N$ | $n_g$          | $\log \bar{M}_*^{\text{lim}}$ | $\log \bar{M}_*^{\text{full}}$ | $\log M'_1$      | $\log M_{\text{min}}$ | $b_g$           | $f_{\text{sat}}$ | $\chi_v^2$ |
|-------------|------------------|-------|----------------|-------------------------------|--------------------------------|------------------|-----------------------|-----------------|------------------|------------|
| 16.2        | 17713            | 0.43  | $0.4 \pm 0.1$  | $10.93 \pm 0.02$              | $11.05 \pm 0.02$               | $14.28 \pm 0.09$ | $13.17 \pm 0.05$      | $3.95 \pm 0.13$ | $0.06 \pm 0.01$  | 0.33       |
| 16.4        | 29385            | 0.42  | $0.7 \pm 0.2$  | $10.86 \pm 0.02$              | $10.99 \pm 0.02$               | $14.03 \pm 0.11$ | $13.00 \pm 0.06$      | $3.57 \pm 0.12$ | $0.09 \pm 0.01$  | 0.74       |
| 16.6        | 47242            | 0.40  | $1.3 \pm 0.3$  | $10.80 \pm 0.01$              | $10.91 \pm 0.02$               | $13.80 \pm 0.09$ | $12.84 \pm 0.05$      | $3.28 \pm 0.08$ | $0.12 \pm 0.01$  | 1.27       |
| 16.8        | 72506            | 0.40  | $2.2 \pm 0.4$  | $10.72 \pm 0.01$              | $10.83 \pm 0.01$               | $13.62 \pm 0.09$ | $12.70 \pm 0.05$      | $3.04 \pm 0.07$ | $0.15 \pm 0.02$  | 1.79       |
| 17.0        | 105801           | 0.40  | $3.2 \pm 0.6$  | $10.63 \pm 0.01$              | $10.74 \pm 0.01$               | $13.51 \pm 0.08$ | $12.57 \pm 0.04$      | $2.85 \pm 0.05$ | $0.15 \pm 0.01$  | 1.93       |
| 17.2        | 146773           | 0.40  | $4.5 \pm 0.8$  | $10.54 \pm 0.01$              | $10.65 \pm 0.01$               | $13.39 \pm 0.09$ | $12.47 \pm 0.05$      | $2.72 \pm 0.06$ | $0.16 \pm 0.02$  | 1.76       |
| 17.4        | 195346           | 0.39  | $6.0 \pm 1.0$  | $10.46 \pm 0.01$              | $10.57 \pm 0.01$               | $13.28 \pm 0.08$ | $12.38 \pm 0.05$      | $2.62 \pm 0.04$ | $0.18 \pm 0.01$  | 1.22       |
| 17.6        | 249444           | 0.38  | $7.6 \pm 1.3$  | $10.36 \pm 0.01$              | $10.48 \pm 0.01$               | $13.20 \pm 0.08$ | $12.30 \pm 0.04$      | $2.52 \pm 0.04$ | $0.18 \pm 0.01$  | 1.04       |
| 17.8        | 308064           | 0.37  | $9.3 \pm 1.5$  | $10.26 \pm 0.01$              | $10.37 \pm 0.01$               | $13.12 \pm 0.10$ | $12.24 \pm 0.06$      | $2.46 \pm 0.04$ | $0.20 \pm 0.02$  | 0.90       |
| 18.0        | 370735           | 0.35  | $11.1 \pm 1.8$ | $10.16 \pm 0.01$              | $10.27 \pm 0.01$               | $13.06 \pm 0.09$ | $12.17 \pm 0.05$      | $2.40 \pm 0.04$ | $0.20 \pm 0.02$  | 1.03       |
| 18.2        | 435672           | 0.34  | $13.0 \pm 2.1$ | $10.06 \pm 0.01$              | $10.18 \pm 0.01$               | $13.00 \pm 0.07$ | $12.12 \pm 0.05$      | $2.35 \pm 0.03$ | $0.21 \pm 0.01$  | 0.95       |
| 18.4        | 503212           | 0.32  | $15.0 \pm 2.3$ | $9.97 \pm 0.01$               | $10.08 \pm 0.01$               | $12.95 \pm 0.07$ | $12.07 \pm 0.05$      | $2.30 \pm 0.03$ | $0.22 \pm 0.01$  | 0.88       |
| 18.6        | 575131           | 0.30  | $17.2 \pm 2.6$ | $9.87 \pm 0.01$               | $9.99 \pm 0.01$                | $12.89 \pm 0.07$ | $12.03 \pm 0.05$      | $2.27 \pm 0.03$ | $0.23 \pm 0.01$  | 0.56       |

With these redshift distributions, we can calculate the spatial number density of observed galaxies at the pivot redshift  $z_p \equiv 1.5$ . Here, we use the SSDF area and the effective number of observed sources in the subsamples,  $N_{\text{obs}}^k$ . This number is derived by summing the inverse of the completeness value for all galaxies, using the relation from Fig. A2. Then, the true number of galaxies within  $z_p \pm \delta z/2$  can be written as

$$N_{\text{true}}^k = \frac{N_{\text{obs}}^k}{f_N^k(z_p)} \frac{\phi_{\text{cut}}^k(z_p)}{\int \phi_{\text{cut}}^k(z') dz'} \delta z. \quad (4)$$

The sampled volume reads as

$$V = \frac{dV(z_p)}{dz} \delta z = \frac{c \Omega \chi^2(z_p)}{H(z_p)} \delta z, \quad (5)$$

where  $\chi(z)$  is the comoving radial distance,  $H(z)$  is the Hubble function,  $c$  is the speed of light and  $\Omega = 0.0271$  sr is the solid angle subtended by the survey. Hence, the number density at  $z_p$  results in

$$n_g^k = \frac{N_{\text{true}}^k}{V}. \quad (6)$$

Note that this quantity is the result of combining the SSDF observed number counts (via  $N_{\text{obs}}^k$ ) and the colour fractions of the control sample. Table 1 shows the values of these number densities for all samples.

### 3.3 Stellar masses

The stellar masses in the reference catalogue are also retrieved to construct our control sample. We use those based on Bruzual & Charlot (2003, hereafter BC03) stellar grids, Chabrier (2003) IMF and Calzetti et al. (2000) dust extinction. Unless otherwise noted, all stellar masses are given under these prescriptions.

For the purposes of this paper, we need to calculate stellar masses for two different selections of galaxies. One is the median mass of all galaxies within each sample, derived at every redshift bin,  $\bar{M}_*^{\text{full}}$ . This mass will be used to derive a redshift scaling of the galaxy bias in Section 5.2. The other,  $\bar{M}_*^{\text{lim}}$ , is the median mass of the galaxies at the pivot redshift ( $z_p = 1.5$ ) and at the magnitude limit of each sample. This is the stellar mass that will be linked in Section 7 to a particular halo mass.

Ideally, in order to calculate  $\bar{M}_*^{\text{full}}$  we would compute the median mass of those galaxies within the given selection range in the parameter space of redshift, magnitude and colour. However, classifying galaxies on whether they fall in that range is not straightforward, since each galaxy is represented by an extended probability distribution in the parameter space. A more insightful approach is to compute the probability that a galaxy's true parameter vector falls within the specified range, which reads as

$$\varrho_j(z) = \int_{\Delta \mathcal{M}} \int_{\Delta c} dm dc \mathcal{P}(m, c, z; \boldsymbol{\mu}_j, \boldsymbol{\sigma}_j), \quad (7)$$

where  $0 < \varrho^j < 1$  and  $j$  is an index that identifies every galaxy in the reference catalogue. Thus, we can calculate  $\bar{M}_*^{\text{full}}$  as the weighted median stellar mass over all galaxies in the reference catalogue, where the set of  $\varrho^j$  act as weight coefficients to the individual stellar masses  $M_*^j$ . By definition, the weighted median mass represents the mass value where the weighted integral of the mass distribution above and below that value is the same, and we write it in the following condensed form

$$\bar{M}_*^{\text{full}} = \text{Median} [\mathbf{M}_*; \text{weights} = \boldsymbol{\varrho}], \quad (8)$$

where we have omitted the implicit dependence on  $z$ . Conveniently, the weighted distribution of masses follows closely a lognormal distribution. Thus, equation (8) returns almost the same value as the weighted mean of  $\log \mathbf{M}_*$ , which allows us to adopt the standard deviation from the latter distribution:

$$\Sigma_M = \frac{\sum (\log M_*^j - \log \bar{M}_*^{\text{full}})^2 \varrho_j}{\sum \varrho_j}, \quad (9)$$

which is typically  $\sim 0.2$  dex. Even though this scatter is rather large, these log-mass distributions are single peaked and approximately symmetric, so their mean value is well defined and physically meaningful. We use the scatter to estimate the error in the mean as

$$\bar{\Sigma}_M = \frac{\Sigma_M}{\sqrt{N_{\text{ind}}}} \quad (10)$$

with

$$N_{\text{ind}} = \frac{(\sum \varrho_j)^2}{\sum \varrho_j^2}. \quad (11)$$

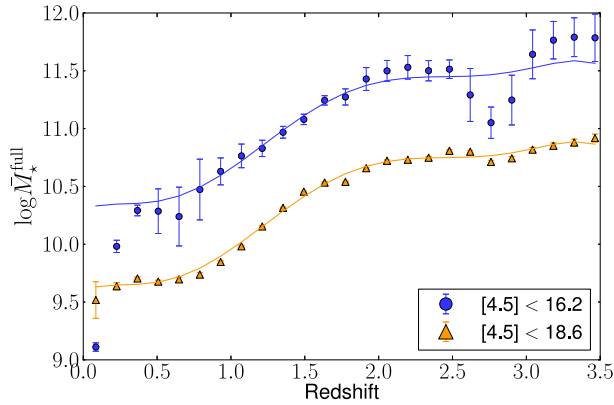

**Figure 6.** Redshift evolution of the median stellar mass in our brightest and faintest samples. The lower solid curve is a polynomial fit to the points from the latter. Those corresponding to the bright sample are noisier, so we offset the lower solid curve to match them. This is physically motivated by the approximation that mass scales linearly with flux.

Here,  $\mathcal{N}_{\text{ind}}$  represents the effective number of independent elements in the ensemble. This number is proportional to the sum of contributing weights and inversely proportional to their scatter. It equals the total number of elements in the reference catalogue in the limit of  $q_j \rightarrow 1$ .

Fig. 6 shows  $\bar{M}_*^{\text{full}}(z)$  for all samples. The errors are from equation (10) and the solid curve is a fifth order polynomial fit to the points of the faintest sample. We use that curve plus an offset to fit the data from the rest of the samples, since it becomes noisier at brighter limits. Here, we take advantage of the fact that stellar mass scales with flux approximately in a linear manner. It is clear from the figure that the mass is tightly correlated with the redshift of observation within  $z = 0-1.5$ . Beyond that, the relation flattens out significantly. The reason for this is that at  $z \geq 1.5$ , the [4.5] band samples the rising spectral slope of the stellar bump (Muzzin et al. 2013b). This offsets the  $k$ -correction in a way that galaxies of a certain intrinsic near-infrared luminosity have a similar apparent [4.5] mag across a range of redshift. A consequence of this is that any [4.5] limited sample becomes roughly stellar mass limited at  $z > 1.5$  (see also fig. 14 in Barro et al. 2011b). Nonetheless, we do not attempt to take advantage of this effect by averaging stellar masses at high redshift. The modelling in this work is based on well-defined median masses as a function of redshift, independent of the form of that redshift dependence. However, the flattening of this curve does benefit our study to some extent. Since there is an inherent uncertainty in how well represented the SSDF data is with the control sample, it is convenient that the stellar masses are naturally more constrained than a case where they had a strong redshift dependence.

We can calculate  $\bar{M}_*^{\text{lim}}$  at  $z_p$  in an analogous way, considering a selection within  $\Delta C$ . The corresponding weights are

$$\kappa_j(\mathcal{M}) = \int_{\Delta C} dc \mathcal{P}(\mathcal{M}, c; z_p, \mu_j, \sigma_j), \quad (12)$$

and replacing  $q_j$  with  $\kappa_j$  in equations (7)–(10) gives us the median mass  $\bar{M}_*^{\text{lim}}$ , along with its error. An example of the stellar mass histograms that are obtained using these weights can be seen in Fig. 7. They are shown for the brightest and faintest magnitude limits of our samples. These distributions are symmetric and have a well-defined mean. The scatter is generally large, with values around  $\sim 0.2$  dex. However, the error in the logarithmic mean (see equation 10) is typically quite small  $\sim 0.03$  dex. The values of these

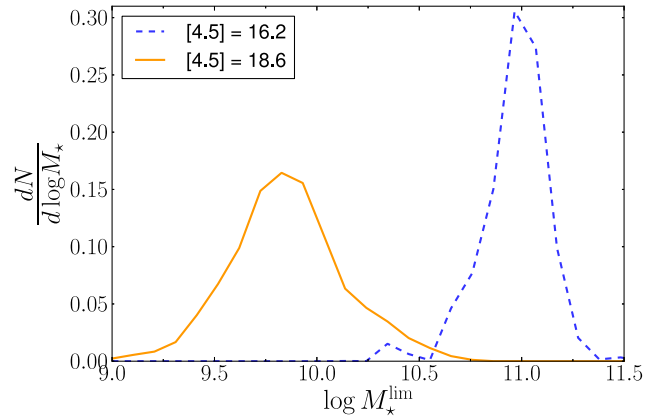

**Figure 7.** Normalized distributions of the  $z = 1.5$  stellar mass at the brightest and faintest magnitude limits of our samples.

limiting masses are displayed in Table 1. Thus, we have calculated the median mass of all galaxies in our samples as a function of redshift, and the median mass of galaxies around the pivot redshift at each sample magnitude limit.

#### 4 TWO-POINT CLUSTERING

Given a population of galaxies in a 3D space, one can define the joint probability of finding two such objects in volume elements  $\delta V_1, \delta V_2$  separated by a distance  $r$  (Peebles 1980; Phillipps et al. 1978):

$$\delta P(r) = \bar{N}^2 (1 + \xi_g(r)) \delta V_1 \delta V_2. \quad (13)$$

Here,  $\bar{N}$  is the density of galaxies and  $\xi_g$  is the SCF, which quantifies the clustering strength of the field as a function of  $r$ . The SCF can also be interpreted as the differential probability of finding two objects separated by a given distance, with respect to the case of a random distribution.

The SCF for a galaxy population can be directly computed if the individual distances (redshifts) to those galaxies are known. However, in our case we are limited to individual sky positions and the ensemble redshift distribution. Therefore, we are interested in the ACF, which is the projection of the SCF on to the 2D sphere. Analogously to the SCF, the ACF represents the differential probability with respect to a random distribution of finding two galaxies separated by a particular angle. The ACF is related to the SCF through the Limber projection (Limber 1953), which integrates the SCF along the line of sight using the normalized redshift distribution  $\phi(z)$  as a weight kernel (Phillipps et al. 1978; Coupon et al. 2012):

$$\omega(\theta) = \frac{2}{c} \int_0^\infty dz H(z) \phi^2(z) \int_0^\infty dy \xi_g(r = \sqrt{y^2 + D_c^2(z)\theta^2}), \quad (14)$$

where  $D_c(z)$  is the radial comoving distance,  $H(z)$  is the Hubble function,  $c$  is the speed of light and  $\theta$  is the angular separation given in radians.

In order to measure  $\omega(\theta)$ , we use the estimator presented in Hamilton (1993), which counts the number of galaxy pairs with respect to those of a random sample distributed in the same geometry:

$$\hat{\omega}(\theta) = \frac{\text{RR}(\theta)\text{GG}(\theta)}{\text{GR}^2(\theta)} - 1, \quad (15)$$

where GG, GR and RR are total number of galaxy–galaxy, galaxy–random and random–random pairs separated by an angle  $\theta$ . We have also tested the estimator from Landy & Szalay (1993), which returns results that are practically indistinguishable from those using equation (15).

In order to account for the completeness shown in Fig. A2, we make a small generalization of equation (15). Instead of counting all pairs with values of 1, we use a weighted scheme where each pair of sources  $\alpha, \beta$  is counted as a product of weights  $\nu_\alpha \nu_\beta$ . Random sources have  $\nu = 1$ , and galaxies have weights equivalent to the inverse of the completeness value at its apparent magnitude. We count pairs by brute force in discrete angular bins using the graphics processing unit on a desktop computer. We have developed our own code, which yields computation times of the order of 1000 times faster than using a CPU-based run with 16 cores. Our code is written in PYCUDA,<sup>1</sup> which is a PYTHON wrapper of the CUDA, the programming language that interfaces with the device.

The estimator in equation (15) implicitly assumes that the average galaxy density of the survey is the same as the all-sky value. However, since the survey is a small fraction of the sky, its density is higher (structures cluster more towards smaller scales) and this results in a systematic suppression of  $\hat{\omega}(\theta)$ . We correct for this effect, even though it is not significant for our results. Details can be found in Appendix C. The values of the corrected ACF for all samples are displayed in Table 2.

#### 4.1 Error estimation

We estimate errors with the jackknife technique, which uses the observed data and is very effective in recovering the covariance of  $\hat{\omega}(\theta)$  between different scales. First, the entire sample is divided into  $N_{\text{jack}} = 64$  spatial regions of equal size. Then, the correlation is run  $N_{\text{jack}}$  times, each one excluding one of those regions from the sample. The value of the estimator is the average  $\bar{\omega}(\theta)$  of those iterations and the covariance between angular bins is given by (Scranton et al. 2002)

$$C_{jk} = \frac{N-1}{N} \sum_{i=0}^N [\hat{\omega}_i(\theta_j) - \bar{\omega}(\theta_j)] [\hat{\omega}_i(\theta_k) - \bar{\omega}(\theta_k)]. \quad (16)$$

We also compare the jackknife errors with those obtained from mock simulations, which are described in Appendix A. We find that both sets of errors have a good agreement, with differences around 20 per cent. Although our mock simulations only cover large scales, the systematic differences between mock and jackknife errors are not expected to vary significantly across different scales for a projected statistic like  $\omega(\theta)$  (Norberg et al. 2009).

## 5 PLACING GALAXIES IN HALOES

The galaxy bias  $b_g$  (see equation 1) encodes all the information that can be extracted from the two-point galaxy distribution, given a particular cosmology. Thus, our aim is to construct a precise model of  $b_g$  and adjust the resulting correlation function to match the observed clustering of galaxies. The main idea behind this model is to assume a halo distribution and place galaxies in haloes according to a set of simple rules, as explained below.

### 5.1 The halo occupation distribution

The distribution of dark matter haloes under the cold dark matter (CDM) paradigm has been well studied both phenomenologically and through simulations (Ma & Fry 2000; Berlind & Weinberg 2002; Cooray & Sheth 2002), leading to a halo model where the halo mass function, the bias  $b_h$  and the halo density profile are determined by the halo mass. The HOD is a statistical framework that has been developed to link the halo model with the distribution of galaxies (Berlind & Weinberg 2002; Cooray & Sheth 2002; Kravtsov et al. 2004). The HOD is mainly described with the probability  $P(N|M)$  that a halo of a given virial mass  $M$  hosts  $N$  galaxies; one central and  $N - 1$  satellites distributed according to a Navarro, Frenk and White (NFW) profile. All galaxies are linked to some halo, and the occupation is independent of their formation history and environment (Zentner et al. 2005). This assumption is generally valid, since the induced changes in the galaxy bias due to environment are expected to be only at the  $\sim 5$  per cent level (Croton, Gao & White 2007; Zu et al. 2008), while the overall uncertainties in galaxy clustering studies are typically larger. For our work in particular, the main source of error arises from the uncertainty in the shape of the redshift distribution, which is explored in Appendix B by comparing results from the use of COSMOS and EGS as reference catalogues. The variations in galaxy bias are around 10 per cent and they do not alter qualitatively any of the final conclusions. Therefore, given that the environmental effects in the galaxy bias are expected to be smaller, we consider them negligible for the current purposes.

The average distribution of central galaxies as a function of halo mass can be written as (Zheng et al. 2005, 2007)

$$N_c(M) = \frac{1}{2} \left[ 1 + \operatorname{erf} \left( \frac{\log M - \log M_{\min}}{\sigma_{\log M}} \right) \right]. \quad (17)$$

This implies that  $N_c(M_{\min}) = 0.5$ . Thus,  $M_{\min}$  sets a step-like transition where half of the haloes above this mass will host a central galaxy, and this transition is smoothed by the scatter  $\sigma_{\log M}$ . The number of satellite galaxies is drawn from a Poisson distribution with mean

$$N_s(M) = N_c(M) \left( \frac{M - M_0}{M_1} \right)^\alpha, \quad (18)$$

and are assumed to follow an NFW (Navarro, Frenk & White 1997) density profile from the halo centre. The factor  $N_c(M)$  accounts for the constraint that only haloes with a central galaxy may host satellites. Equation (18) represents a power law, where  $\alpha$  sets the steepness,  $M_1$  defines the typical mass scale for this distribution being close to unity and  $M_0$  represents the mass below which the power law is cut off. In addition, one can derive the characteristic mass where a halo hosts exactly one satellite on average,  $M_1$ , by imposing  $N_s(M_1) \equiv 1$  and noting that generally  $N_c(M \approx M_1) = 1$ . In the case where  $M_0 = 0$  it reduces simply to  $M_1 = M_1'$ , and when  $\alpha = 1$  then  $M_1 = M_1' + M_0$ . The occupation distribution of the total number of galaxies in a halo can be expressed as the sum of the central and satellite terms:

$$N(M) = N_c(M) + N_s(M). \quad (19)$$

Other HOD-derived quantities are the effective galaxy bias

$$b_g^{\text{eff}} = \frac{1}{n_g} \int dM \frac{dn(M)}{dM} N(M) b_h(M), \quad (20)$$

and the fraction of satellite galaxies

$$f_{\text{sat}} = \frac{1}{n_g} \int dM \frac{dn(M)}{dM} N_s(M). \quad (21)$$

<sup>1</sup> [documentician.de/pycuda/](http://documentician.de/pycuda/)



**Table 2.** Measured angular correlation for all our samples, which are denoted by their limiting [4.5] magnitude in the first row. These values have been corrected for the integral constraint.

| $\theta$ (degrees) | 16.2                           | 16.4                          | 16.6                          | 16.8                          | 17.0                          | 17.2                          | 17.4                          |
|--------------------|--------------------------------|-------------------------------|-------------------------------|-------------------------------|-------------------------------|-------------------------------|-------------------------------|
| 0.0019             | $2.8 \pm 0.9 \times 10^0$      | $1.9 \pm 0.4 \times 10^0$     | $1.7 \pm 0.2 \times 10^0$     | $1.5 \pm 0.2 \times 10^0$     | $1.3 \pm 0.1 \times 10^0$     | $1.2 \pm 0.1 \times 10^0$     | $1.1 \pm 0.1 \times 10^0$     |
| 0.0025             | $1.8 \pm 0.5 \times 10^0$      | $1.6 \pm 0.3 \times 10^0$     | $1.2 \pm 0.1 \times 10^0$     | $1.1 \pm 0.1 \times 10^0$     | $8.6 \pm 0.6 \times 10^{-1}$  | $7.5 \pm 0.4 \times 10^{-1}$  | $6.5 \pm 0.3 \times 10^{-1}$  |
| 0.0033             | $9.5 \pm 3.0 \times 10^{-1}$   | $9.3 \pm 1.6 \times 10^{-1}$  | $7.5 \pm 0.9 \times 10^{-1}$  | $6.6 \pm 0.7 \times 10^{-1}$  | $5.8 \pm 0.5 \times 10^{-1}$  | $5.3 \pm 0.3 \times 10^{-1}$  | $4.6 \pm 0.2 \times 10^{-1}$  |
| 0.0044             | $4.2 \pm 2.1 \times 10^{-1}$   | $5.1 \pm 1.2 \times 10^{-1}$  | $5.0 \pm 0.6 \times 10^{-1}$  | $4.3 \pm 0.3 \times 10^{-1}$  | $3.6 \pm 0.3 \times 10^{-1}$  | $3.3 \pm 0.2 \times 10^{-1}$  | $2.9 \pm 0.2 \times 10^{-1}$  |
| 0.0058             | $3.7 \pm 1.9 \times 10^{-1}$   | $3.6 \pm 0.8 \times 10^{-1}$  | $3.7 \pm 0.5 \times 10^{-1}$  | $3.6 \pm 0.3 \times 10^{-1}$  | $3.0 \pm 0.2 \times 10^{-1}$  | $2.5 \pm 0.2 \times 10^{-1}$  | $2.0 \pm 0.1 \times 10^{-1}$  |
| 0.0077             | $3.0 \pm 1.0 \times 10^{-1}$   | $1.5 \pm 0.5 \times 10^{-1}$  | $1.7 \pm 0.3 \times 10^{-1}$  | $1.6 \pm 0.2 \times 10^{-1}$  | $1.7 \pm 0.1 \times 10^{-1}$  | $1.4 \pm 0.1 \times 10^{-1}$  | $1.4 \pm 0.1 \times 10^{-1}$  |
| 0.0102             | $2.1 \pm 0.9 \times 10^{-1}$   | $1.9 \pm 0.4 \times 10^{-1}$  | $2.0 \pm 0.2 \times 10^{-1}$  | $1.7 \pm 0.1 \times 10^{-1}$  | $1.4 \pm 0.1 \times 10^{-1}$  | $1.3 \pm 0.1 \times 10^{-1}$  | $1.1 \pm 0.1 \times 10^{-1}$  |
| 0.0135             | $1.8 \pm 0.5 \times 10^{-1}$   | $1.6 \pm 0.3 \times 10^{-1}$  | $1.4 \pm 0.2 \times 10^{-1}$  | $1.3 \pm 0.1 \times 10^{-1}$  | $1.1 \pm 0.1 \times 10^{-1}$  | $1.0 \pm 0.1 \times 10^{-1}$  | $9.3 \pm 0.8 \times 10^{-2}$  |
| 0.0178             | $9.7 \pm 5.7 \times 10^{-2}$   | $1.0 \pm 0.2 \times 10^{-1}$  | $1.1 \pm 0.1 \times 10^{-1}$  | $1.1 \pm 0.1 \times 10^{-1}$  | $9.9 \pm 0.8 \times 10^{-2}$  | $8.8 \pm 0.7 \times 10^{-2}$  | $7.7 \pm 0.7 \times 10^{-2}$  |
| 0.0235             | $1.4 \pm 0.3 \times 10^{-1}$   | $1.3 \pm 0.1 \times 10^{-1}$  | $1.0 \pm 0.1 \times 10^{-1}$  | $9.3 \pm 0.9 \times 10^{-2}$  | $7.9 \pm 0.7 \times 10^{-2}$  | $7.4 \pm 0.5 \times 10^{-2}$  | $6.6 \pm 0.5 \times 10^{-2}$  |
| 0.0311             | $6.3 \pm 3.0 \times 10^{-2}$   | $8.5 \pm 1.9 \times 10^{-2}$  | $7.6 \pm 1.0 \times 10^{-2}$  | $7.5 \pm 0.7 \times 10^{-2}$  | $6.3 \pm 0.5 \times 10^{-2}$  | $5.7 \pm 0.4 \times 10^{-2}$  | $5.0 \pm 0.4 \times 10^{-2}$  |
| 0.0411             | $5.9 \pm 1.9 \times 10^{-2}$   | $6.8 \pm 1.1 \times 10^{-2}$  | $7.2 \pm 0.7 \times 10^{-2}$  | $6.8 \pm 0.7 \times 10^{-2}$  | $5.7 \pm 0.4 \times 10^{-2}$  | $4.9 \pm 0.3 \times 10^{-2}$  | $4.4 \pm 0.2 \times 10^{-2}$  |
| 0.0543             | $4.5 \pm 1.7 \times 10^{-2}$   | $5.3 \pm 1.0 \times 10^{-2}$  | $4.7 \pm 0.7 \times 10^{-2}$  | $4.3 \pm 0.5 \times 10^{-2}$  | $4.2 \pm 0.3 \times 10^{-2}$  | $3.8 \pm 0.3 \times 10^{-2}$  | $3.5 \pm 0.2 \times 10^{-2}$  |
| 0.0717             | $4.9 \pm 1.2 \times 10^{-2}$   | $3.9 \pm 0.8 \times 10^{-2}$  | $3.6 \pm 0.5 \times 10^{-2}$  | $3.5 \pm 0.3 \times 10^{-2}$  | $3.2 \pm 0.2 \times 10^{-2}$  | $2.8 \pm 0.2 \times 10^{-2}$  | $2.6 \pm 0.1 \times 10^{-2}$  |
| 0.0947             | $2.5 \pm 1.1 \times 10^{-2}$   | $2.6 \pm 0.6 \times 10^{-2}$  | $2.8 \pm 0.5 \times 10^{-2}$  | $2.7 \pm 0.3 \times 10^{-2}$  | $2.5 \pm 0.2 \times 10^{-2}$  | $2.3 \pm 0.2 \times 10^{-2}$  | $2.1 \pm 0.1 \times 10^{-2}$  |
| 0.1250             | $2.8 \pm 0.8 \times 10^{-2}$   | $2.7 \pm 0.5 \times 10^{-2}$  | $2.1 \pm 0.3 \times 10^{-2}$  | $2.2 \pm 0.2 \times 10^{-2}$  | $1.9 \pm 0.2 \times 10^{-2}$  | $1.7 \pm 0.1 \times 10^{-2}$  | $1.6 \pm 0.1 \times 10^{-2}$  |
| 0.1651             | $2.0 \pm 0.6 \times 10^{-2}$   | $1.8 \pm 0.4 \times 10^{-2}$  | $1.8 \pm 0.3 \times 10^{-2}$  | $1.7 \pm 0.3 \times 10^{-2}$  | $1.5 \pm 0.2 \times 10^{-2}$  | $1.4 \pm 0.1 \times 10^{-2}$  | $1.3 \pm 0.1 \times 10^{-2}$  |
| 0.2180             | $1.8 \pm 0.5 \times 10^{-2}$   | $1.3 \pm 0.3 \times 10^{-2}$  | $1.4 \pm 0.3 \times 10^{-2}$  | $1.4 \pm 0.2 \times 10^{-2}$  | $1.2 \pm 0.1 \times 10^{-2}$  | $1.0 \pm 0.1 \times 10^{-2}$  | $9.9 \pm 1.3 \times 10^{-3}$  |
| 0.2879             | $7.2 \pm 4.4 \times 10^{-3}$   | $1.1 \pm 0.3 \times 10^{-2}$  | $1.0 \pm 0.2 \times 10^{-2}$  | $9.8 \pm 2.0 \times 10^{-3}$  | $9.2 \pm 1.7 \times 10^{-3}$  | $8.1 \pm 1.3 \times 10^{-3}$  | $7.3 \pm 1.1 \times 10^{-3}$  |
| 0.3802             | $9.4 \pm 3.6 \times 10^{-3}$   | $8.3 \pm 2.2 \times 10^{-3}$  | $7.4 \pm 2.0 \times 10^{-3}$  | $6.6 \pm 1.7 \times 10^{-3}$  | $5.7 \pm 1.4 \times 10^{-3}$  | $5.2 \pm 1.0 \times 10^{-3}$  | $4.7 \pm 0.9 \times 10^{-3}$  |
| 0.5021             | $5.5 \pm 2.7 \times 10^{-3}$   | $4.4 \pm 2.1 \times 10^{-3}$  | $5.1 \pm 1.5 \times 10^{-3}$  | $4.6 \pm 1.2 \times 10^{-3}$  | $3.7 \pm 0.9 \times 10^{-3}$  | $3.3 \pm 0.8 \times 10^{-3}$  | $3.0 \pm 0.7 \times 10^{-3}$  |
| 0.6630             | $4.8 \pm 2.4 \times 10^{-3}$   | $3.2 \pm 1.8 \times 10^{-3}$  | $3.1 \pm 1.3 \times 10^{-3}$  | $3.3 \pm 1.2 \times 10^{-3}$  | $2.7 \pm 1.0 \times 10^{-3}$  | $2.3 \pm 0.8 \times 10^{-3}$  | $2.1 \pm 0.7 \times 10^{-3}$  |
| 0.8755             | $1.7 \pm 1.8 \times 10^{-3}$   | $2.6 \pm 1.4 \times 10^{-3}$  | $2.5 \pm 1.0 \times 10^{-3}$  | $2.3 \pm 0.9 \times 10^{-3}$  | $1.4 \pm 0.8 \times 10^{-3}$  | $1.5 \pm 0.6 \times 10^{-3}$  | $1.3 \pm 0.5 \times 10^{-3}$  |
| 1.1561             | $2.0 \pm 1.7 \times 10^{-3}$   | $1.7 \pm 1.2 \times 10^{-3}$  | $1.6 \pm 0.9 \times 10^{-3}$  | $1.0 \pm 0.8 \times 10^{-3}$  | $8.5 \pm 6.7 \times 10^{-4}$  | $7.7 \pm 5.8 \times 10^{-4}$  | $7.8 \pm 5.4 \times 10^{-4}$  |
| 1.5266             | $-5.1 \pm 13.0 \times 10^{-4}$ | $1.3 \pm 9.4 \times 10^{-4}$  | $1.0 \pm 7.2 \times 10^{-4}$  | $-1.1 \pm 6.8 \times 10^{-4}$ | $-0.2 \pm 6.1 \times 10^{-4}$ | $-1.0 \pm 4.8 \times 10^{-4}$ | $1.0 \pm 4.5 \times 10^{-4}$  |
| 2.0158             | $-7.4 \pm 9.5 \times 10^{-4}$  | $0.3 \pm 7.1 \times 10^{-4}$  | $-2.9 \pm 5.9 \times 10^{-4}$ | $-3.7 \pm 5.5 \times 10^{-4}$ | $-5.4 \pm 4.5 \times 10^{-4}$ | $-5.1 \pm 3.6 \times 10^{-4}$ | $-4.6 \pm 2.9 \times 10^{-4}$ |
| 2.6618             | $-4.0 \pm 10.0 \times 10^{-4}$ | $1.4 \pm 7.1 \times 10^{-4}$  | $-2.7 \pm 6.0 \times 10^{-4}$ | $-4.2 \pm 4.9 \times 10^{-4}$ | $-2.6 \pm 4.3 \times 10^{-4}$ | $-1.9 \pm 3.9 \times 10^{-4}$ | $-3.0 \pm 3.3 \times 10^{-4}$ |
| 3.5148             | $-9.4 \pm 9.3 \times 10^{-4}$  | $-1.2 \pm 0.5 \times 10^{-3}$ | $-1.0 \pm 0.4 \times 10^{-3}$ | $-7.4 \pm 4.3 \times 10^{-4}$ | $-4.7 \pm 3.3 \times 10^{-4}$ | $-4.4 \pm 2.9 \times 10^{-4}$ | $-4.2 \pm 2.5 \times 10^{-4}$ |
| $\theta$ (degrees) | 17.6                           | 17.8                          | 18.0                          | 18.2                          | 18.4                          | 18.6                          |                               |
| 0.0019             | $9.0 \pm 0.4 \times 10^{-1}$   | $7.5 \pm 0.3 \times 10^{-1}$  | $6.5 \pm 0.3 \times 10^{-1}$  | $5.7 \pm 0.2 \times 10^{-1}$  | $5.0 \pm 0.2 \times 10^{-1}$  | $4.3 \pm 0.2 \times 10^{-1}$  |                               |
| 0.0025             | $5.7 \pm 0.3 \times 10^{-1}$   | $5.0 \pm 0.2 \times 10^{-1}$  | $4.4 \pm 0.2 \times 10^{-1}$  | $3.9 \pm 0.2 \times 10^{-1}$  | $3.4 \pm 0.2 \times 10^{-1}$  | $2.9 \pm 0.1 \times 10^{-1}$  |                               |
| 0.0033             | $4.0 \pm 0.2 \times 10^{-1}$   | $3.5 \pm 0.2 \times 10^{-1}$  | $3.0 \pm 0.2 \times 10^{-1}$  | $2.5 \pm 0.2 \times 10^{-1}$  | $2.3 \pm 0.1 \times 10^{-1}$  | $1.9 \pm 0.1 \times 10^{-1}$  |                               |
| 0.0044             | $2.6 \pm 0.1 \times 10^{-1}$   | $2.3 \pm 0.1 \times 10^{-1}$  | $2.0 \pm 0.1 \times 10^{-1}$  | $1.8 \pm 0.1 \times 10^{-1}$  | $1.6 \pm 0.1 \times 10^{-1}$  | $1.4 \pm 0.1 \times 10^{-1}$  |                               |
| 0.0058             | $1.9 \pm 0.1 \times 10^{-1}$   | $1.6 \pm 0.1 \times 10^{-1}$  | $1.4 \pm 0.1 \times 10^{-1}$  | $1.2 \pm 0.1 \times 10^{-1}$  | $1.1 \pm 0.1 \times 10^{-1}$  | $1.0 \pm 0.1 \times 10^{-1}$  |                               |
| 0.0077             | $1.2 \pm 0.1 \times 10^{-1}$   | $1.1 \pm 0.1 \times 10^{-1}$  | $1.0 \pm 0.1 \times 10^{-1}$  | $9.0 \pm 1.0 \times 10^{-2}$  | $8.0 \pm 0.9 \times 10^{-2}$  | $7.1 \pm 0.9 \times 10^{-2}$  |                               |
| 0.0102             | $1.0 \pm 0.1 \times 10^{-1}$   | $9.4 \pm 0.9 \times 10^{-2}$  | $8.6 \pm 0.8 \times 10^{-2}$  | $7.5 \pm 0.8 \times 10^{-2}$  | $6.7 \pm 0.8 \times 10^{-2}$  | $6.2 \pm 0.8 \times 10^{-2}$  |                               |
| 0.0135             | $8.1 \pm 0.8 \times 10^{-2}$   | $7.4 \pm 0.8 \times 10^{-2}$  | $6.5 \pm 0.7 \times 10^{-2}$  | $5.8 \pm 0.7 \times 10^{-2}$  | $5.3 \pm 0.7 \times 10^{-2}$  | $4.8 \pm 0.7 \times 10^{-2}$  |                               |
| 0.0178             | $6.5 \pm 0.6 \times 10^{-2}$   | $5.9 \pm 0.5 \times 10^{-2}$  | $5.3 \pm 0.5 \times 10^{-2}$  | $5.0 \pm 0.5 \times 10^{-2}$  | $4.4 \pm 0.5 \times 10^{-2}$  | $3.9 \pm 0.5 \times 10^{-2}$  |                               |
| 0.0235             | $5.8 \pm 0.4 \times 10^{-2}$   | $5.3 \pm 0.4 \times 10^{-2}$  | $4.8 \pm 0.4 \times 10^{-2}$  | $4.1 \pm 0.3 \times 10^{-2}$  | $3.7 \pm 0.3 \times 10^{-2}$  | $3.3 \pm 0.3 \times 10^{-2}$  |                               |
| 0.0311             | $4.5 \pm 0.3 \times 10^{-2}$   | $4.1 \pm 0.3 \times 10^{-2}$  | $3.8 \pm 0.3 \times 10^{-2}$  | $3.4 \pm 0.3 \times 10^{-2}$  | $3.0 \pm 0.3 \times 10^{-2}$  | $2.7 \pm 0.2 \times 10^{-2}$  |                               |
| 0.0411             | $4.1 \pm 0.2 \times 10^{-2}$   | $3.4 \pm 0.2 \times 10^{-2}$  | $3.0 \pm 0.2 \times 10^{-2}$  | $2.7 \pm 0.2 \times 10^{-2}$  | $2.4 \pm 0.2 \times 10^{-2}$  | $2.1 \pm 0.2 \times 10^{-2}$  |                               |
| 0.0543             | $3.1 \pm 0.2 \times 10^{-2}$   | $2.7 \pm 0.2 \times 10^{-2}$  | $2.4 \pm 0.1 \times 10^{-2}$  | $2.1 \pm 0.1 \times 10^{-2}$  | $1.9 \pm 0.1 \times 10^{-2}$  | $1.7 \pm 0.1 \times 10^{-2}$  |                               |
| 0.0717             | $2.4 \pm 0.1 \times 10^{-2}$   | $2.0 \pm 0.1 \times 10^{-2}$  | $1.8 \pm 0.1 \times 10^{-2}$  | $1.6 \pm 0.1 \times 10^{-2}$  | $1.5 \pm 0.1 \times 10^{-2}$  | $1.3 \pm 0.1 \times 10^{-2}$  |                               |
| 0.0947             | $1.8 \pm 0.1 \times 10^{-2}$   | $1.7 \pm 0.1 \times 10^{-2}$  | $1.5 \pm 0.1 \times 10^{-2}$  | $1.3 \pm 0.1 \times 10^{-2}$  | $1.2 \pm 0.1 \times 10^{-2}$  | $1.0 \pm 0.1 \times 10^{-2}$  |                               |
| 0.1250             | $1.5 \pm 0.1 \times 10^{-2}$   | $1.3 \pm 0.1 \times 10^{-2}$  | $1.2 \pm 0.1 \times 10^{-2}$  | $1.0 \pm 0.0 \times 10^{-2}$  | $9.5 \pm 0.8 \times 10^{-3}$  | $8.4 \pm 0.7 \times 10^{-3}$  |                               |
| 0.1651             | $1.1 \pm 0.1 \times 10^{-2}$   | $1.0 \pm 0.1 \times 10^{-2}$  | $9.6 \pm 1.1 \times 10^{-3}$  | $8.7 \pm 1.1 \times 10^{-3}$  | $7.7 \pm 1.0 \times 10^{-3}$  | $6.9 \pm 0.9 \times 10^{-3}$  |                               |
| 0.2180             | $8.7 \pm 1.2 \times 10^{-3}$   | $7.8 \pm 1.0 \times 10^{-3}$  | $6.8 \pm 0.9 \times 10^{-3}$  | $6.2 \pm 0.7 \times 10^{-3}$  | $5.7 \pm 0.7 \times 10^{-3}$  | $5.0 \pm 0.6 \times 10^{-3}$  |                               |
| 0.2879             | $6.3 \pm 1.0 \times 10^{-3}$   | $5.6 \pm 0.9 \times 10^{-3}$  | $5.0 \pm 0.8 \times 10^{-3}$  | $4.6 \pm 0.7 \times 10^{-3}$  | $4.1 \pm 0.7 \times 10^{-3}$  | $3.6 \pm 0.6 \times 10^{-3}$  |                               |
| 0.3802             | $4.1 \pm 0.8 \times 10^{-3}$   | $3.7 \pm 0.7 \times 10^{-3}$  | $3.4 \pm 0.7 \times 10^{-3}$  | $3.0 \pm 0.6 \times 10^{-3}$  | $2.8 \pm 0.6 \times 10^{-3}$  | $2.5 \pm 0.5 \times 10^{-3}$  |                               |
| 0.5021             | $2.7 \pm 0.6 \times 10^{-3}$   | $2.4 \pm 0.5 \times 10^{-3}$  | $2.3 \pm 0.5 \times 10^{-3}$  | $2.0 \pm 0.4 \times 10^{-3}$  | $1.8 \pm 0.4 \times 10^{-3}$  | $1.6 \pm 0.3 \times 10^{-3}$  |                               |
| 0.6630             | $1.8 \pm 0.6 \times 10^{-3}$   | $1.5 \pm 0.5 \times 10^{-3}$  | $1.5 \pm 0.5 \times 10^{-3}$  | $1.2 \pm 0.4 \times 10^{-3}$  | $1.1 \pm 0.4 \times 10^{-3}$  | $1.0 \pm 0.3 \times 10^{-3}$  |                               |
| 0.8755             | $1.0 \pm 0.5 \times 10^{-3}$   | $8.8 \pm 4.7 \times 10^{-4}$  | $8.3 \pm 4.3 \times 10^{-4}$  | $7.6 \pm 3.8 \times 10^{-4}$  | $7.2 \pm 3.4 \times 10^{-4}$  | $5.7 \pm 3.0 \times 10^{-4}$  |                               |
| 1.1561             | $6.5 \pm 4.5 \times 10^{-4}$   | $6.6 \pm 4.2 \times 10^{-4}$  | $5.4 \pm 3.7 \times 10^{-4}$  | $5.6 \pm 3.3 \times 10^{-4}$  | $5.4 \pm 3.0 \times 10^{-4}$  | $4.5 \pm 2.6 \times 10^{-4}$  |                               |
| 1.5266             | $1.2 \pm 3.7 \times 10^{-4}$   | $1.8 \pm 3.2 \times 10^{-4}$  | $1.7 \pm 2.7 \times 10^{-4}$  | $1.9 \pm 2.6 \times 10^{-4}$  | $1.7 \pm 2.3 \times 10^{-4}$  | $1.2 \pm 2.1 \times 10^{-4}$  |                               |
| 2.0158             | $-3.3 \pm 2.6 \times 10^{-4}$  | $-2.0 \pm 2.3 \times 10^{-4}$ | $-1.4 \pm 2.0 \times 10^{-4}$ | $-1.1 \pm 1.9 \times 10^{-4}$ | $-0.7 \pm 1.7 \times 10^{-4}$ | $-0.8 \pm 1.6 \times 10^{-4}$ |                               |
| 2.6618             | $-2.1 \pm 2.6 \times 10^{-4}$  | $-2.4 \pm 2.3 \times 10^{-4}$ | $-1.8 \pm 2.0 \times 10^{-4}$ | $-1.7 \pm 1.8 \times 10^{-4}$ | $-2.0 \pm 1.5 \times 10^{-4}$ | $-1.8 \pm 1.4 \times 10^{-4}$ |                               |
| 3.5148             | $-3.3 \pm 2.0 \times 10^{-4}$  | $-2.8 \pm 1.8 \times 10^{-4}$ | $-2.7 \pm 1.5 \times 10^{-4}$ | $-2.6 \pm 1.4 \times 10^{-4}$ | $-2.4 \pm 1.3 \times 10^{-4}$ | $-1.8 \pm 1.1 \times 10^{-4}$ |                               |

Downloaded from https://academic.oup.com/mnras/article/446/1/169/1307763 by guest on 24 April 2024

Further details about the halo model used here can be found in the Appendix D.

## 5.2 Redshift scaling

We aim to fit the halo model at the pivot redshift  $z_p = 1.5$ . However, the galaxies in our samples have redshift distributions that are too broad to be neglected or averaged over (see Fig. 5). Thus, our approach is to produce  $\xi_g^p \equiv \xi_g(z = z_p)$ , and scale it using a simple prescription to generate  $\xi_g$  at all other redshifts. We then use equation (14) to make a redshift projection of  $\xi_g(z)$  on to  $\omega(\theta)$ .

The scaling we apply is based on how the large-scale clustering (represented by the two-halo term  $\xi_g^{2h}$ , see equation D16) varies with redshift. This change in amplitude is driven by the growth factor  $G(z)$  of the dark matter and the galaxy bias  $b_g(z)$ . Hence, we can write

$$\xi_g(z) = \frac{G^2(z) b_g^2(z)}{G^2(z_p) b_g^{\text{eff}^2} \xi_g^p} \quad (22)$$

where  $b_g^{\text{eff}}$  and  $\xi_g^p$  are set at  $z_p$  by construction. Here, we have made the approximation that the entire correlation function can be scaled with a single factor. However, the relative amplitude of the one- and two-halo terms is known to evolve (Conroy et al. 2006; Watson, Berlind & Zentner 2011), in the sense that typically the one-halo term is more prominent at higher redshift. We have tested how  $\omega(\theta)$  would change if we allow for some differential redshift scaling between the one- and two-halo terms of  $\xi_g$ . This was done applying a linearly redshift-dependent factor to the one-halo term, in addition to the general scaling from equation (22). In this way, below and above  $z_p$  the one halo becomes reduced and boosted, respectively. We find that this has a very little effect on the resulting ACF. This is because the redshift distributions of our galaxies are more or less symmetric, so that the relative scaling of the one halo above and below  $z_p$  is almost cancelled when these contributions are summed together. In reality, this relative scaling might have a more complex dependence on redshift, but we believe that the linear representation we considered here is adequate given the symmetric and peaked forms of our redshift distributions. Thus, we find that our model is not sensitive to the particular evolution of the one-halo term and do not incorporate it in the determination of our results.

Our general approach is to calculate the bias as a function of the evolving median stellar mass,  $b_g(z) = b_g(\bar{M}_*^{\text{full}}(z))$ . For this purpose, we make use of the galaxy bias as a function of stellar mass and redshift presented in Moster et al. (2010, hereafter M10),  $b_g^{\text{M10}}(M_*, z)$ . However, we do not use their bias values directly since we need to enforce that  $b_g(z_p) = b_g^{\text{eff}}$ , i.e. the bias function has to match the HOD bias at the redshift of the fit. Our bias function is normalized to hold that constraint, but the scaling at other redshifts is adopted from M10 (for a given stellar mass). To accomplish this, first we define the stellar mass  $M_*^f$  where  $b_g^{\text{M10}}(M_*^f, z_p) = b_g^{\text{eff}}$ . Ideally,  $M_*^f$  would be equal to the median mass of the sample from Section 3.3,  $\bar{M}_*^{\text{full}}(z_p)$ , but they differ. This is not surprising, since the modelling in M10 is based on abundance matching, which is different from our clustering approach and can potentially yield differing values of the bias. In addition, some variations are expected given the differences in models and codes used to derive stellar masses in M10 and our reference sample. However, the M10 masses by themselves are not relevant to us, and they simply represent a quantity or label that links brighter populations of galaxies with a larger bias. Therefore, it is sufficient to assume a priori that all these masses hold a monotonic relationship with sample luminosity, which has been proven correct

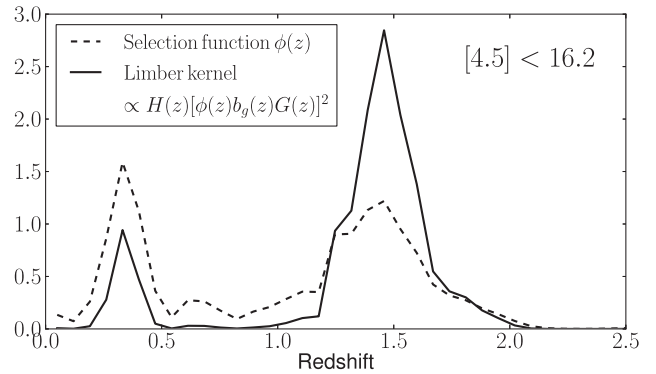

**Figure 8.** Comparison of the normalized redshift distribution  $\phi(z)$  of the brightest sample ( $15 < [4.5] < 16.2$ ), which has the most prominent low-redshift bump, and the corresponding Limber kernel. The y-scaling is arbitrary in either curve. In the Limber projection, the bias function boosts the contribution of high- $z$  galaxies, since they are also more massive. This effect minimizes the contribution of the low-redshift bump to the ACF.

a posteriori. In other words,  $M_*^f$  does scale monotonically with  $\bar{M}_*^{\text{full}}$  across all samples. So, for a given sample, what we calculate is the offset  $\Delta \log M_* = \log M_*^f - \log \bar{M}_*^{\text{full}}$  at  $z_p$ . In this way, we are able to ‘convert’ our stellar masses into M10 masses. Our bias function then becomes

$$b_g(z) = b_g^{\text{M10}}(\log \bar{M}_*^{\text{full}}(z) + \Delta \log M_*, z). \quad (23)$$

In Section 3.3, we calculated  $\bar{M}_*^{\text{full}}(z)$  for all samples. For the brightest ones, the data become a bit noisy due to the low number density (see Fig. 6). This mass distribution is consistent with having a constant shape and varying it by some normalization that scales with the magnitude limit of the sample. Thus, we adopt the functional form of the largest sample  $\bar{M}_*^{\text{full}}(z; k = 13)$ , which is given by the polynomial fit shown in Fig. 6. The normalization of this function does not need to be taken into account, since it will be implicitly incorporated in  $\Delta \log M_*$ .

The stellar mass dependence of the bias has an important effect on  $\omega(\theta)$ . Because the stellar mass of our samples is larger at high redshift (about 10 times larger at  $z = 1.5$  than at  $z = 0.5$ ; see Fig. 6), the bias will place a stronger weight there than at low redshift. This helps to minimize the contribution of the undesired low-redshift bump at  $z \sim 0.3$ . Additionally, there are other functions weighing in the Limber projection, which is proportional to  $H(z)[\phi(z)b_g(z)G(z)]^2$ , as inferred from equations (14) and (22). Fig. 8 shows the comparison between the redshift distribution  $\phi(z)$  and the full Limber kernel. It is shown for the brightest sample because it is the one with the highest fraction of low-redshift contaminants. In the end, the low-redshift contribution to the clustering is minimized due to the decrease in  $\bar{M}_*^{\text{full}}(z)$ , which suppresses  $b_g(z)$ . This effect is convenient for our analysis, since it makes the clustering properties of our samples highly representative of the  $z \sim 1.5$  Universe. Moreover, in Appendix E we investigate how the final results are impacted by the use of available optical data in the SSDF field to remove low-redshift sources. We find that the changes in the results are negligible compared to keeping these sources and modelling their weak contribution to the clustering, as done in this section.

A possible concern at this point is that the results from M10 would be ‘built in’ to ours through the coupling with equation (23). However, the normalization of the bias is set by our own data, and it is the redshift modulation that we incorporate from these authors. In addition, we have explored variations of  $b_g^{\text{M10}}(M_*, z)$

and determined that our model is not very sensitive to such changes. As seen in Fig. 8, the redshift modulation plays a role in weighing galaxies at  $z = 0.3$  versus  $z = 1.5$ . Basically, any function that down-weights the low-redshift bump will do so in a manner that it becomes quickly subdominant. We just need a function that reflects approximately the variation of the bias with stellar mass and redshift, which is precisely what is provided by scalings from M10. Our model does not strongly depend on the detailed form of this function, and we have verified that our results are not pre-set in a significant way by those in M10.

## 6 HOD MODEL FITS

The fitting procedure is based on maximizing the likelihood of the model given the observable  $\mathcal{L}(\text{mod}|\text{obs}) = e^{-\chi^2}$ , with

$$\chi^2 = \sum_{i=0}^N \sum_{j=0}^N [\omega_m(\theta_j) - \bar{\omega}(\theta_j)] C_{ij}^{-1} [\omega_m(\theta_k) - \bar{\omega}(\theta_k)]. \quad (24)$$

Here,  $\omega_m$  and  $\bar{\omega}$  are the model and observed ACFs,  $C_{ij}$  is the covariance matrix from equation (16) and  $N = 28$  is the number of angular bins. The halo occupation model we consider has a total of five parameters:  $M_{\min}$ ,  $M'_1$ ,  $M_0$ ,  $\alpha$  and  $\sigma_{\log M}$ . Even though the signal-to-noise ratio (S/N) of our ACFs is very good ( $11\sigma$ – $31\sigma$  with respect to the null hypothesis), the fact that it is the result of projecting the SCF across a wide redshift distribution reduces our constraining power on the HOD model. Thus, to avoid overfitting the data, we choose to fix a number of parameters. We have run sets of Monte Carlo Markov chains to explore the sensitivity of the model to different choices of constraints. To evaluate this sensitivity, we use the Akaike criterion (Akaike 1974), which states that an extra free parameter is justified only when the new best-fitting  $\chi^2$  is reduced by an amount larger than 2. For either  $\sigma_{\log M}$  and  $M_0$ , this criterion is not fulfilled. Thus, we follow Conroy et al. (2006) and set  $\log M_0 = 0.76 \log M_1 + 2.3$ . We also fix  $\sigma_{\log M} = 0.2$ , following a number of studies that support typical values  $>0.15$  (More et al. 2009, 2011; Behroozi et al. 2010, 2013; Wake et al. 2011; Moster et al. 2013; Reddick et al. 2013). In the case of  $\alpha$ , we have that  $\Delta\chi^2 \approx 3$ , which would mildly favour setting it free. However, this parameter has an intrinsic degeneracy with  $M'_1$  and when left free to float, the best-fitting values show a significant stochastic component in their behaviour with respect to sample luminosity. It cannot be constrained as well as  $M_1$ , and thus we decide to fix it to a common choice in the literature that is also supported by simulations,  $\alpha = 1$  (Kravtsov et al. 2004; Tinker et al. 2005; Zentner et al. 2005; Zheng et al. 2005; Wake et al. 2011; Zehavi et al. 2011; Leauthaud et al. 2012). None of the final conclusions in this work change whether or not we allow  $\alpha$  to vary freely. Additionally, equation (D7) fixes  $M_{\min}$  through the observed galaxy number density, leaving  $M'_1$  as the only parameter left in the fit. In Appendix F, we comment on how the resulting HOD model changes if we leave nearly all parameters free in the fit.

Obtaining the best-fitting value of  $M'_1$  is straightforward. The error in the fit can be estimated from the width of the likelihood distribution, but it does not account for departures arising from cosmic variance. To account for that, we perform a set of 100 random realizations of the redshift distribution and number density at  $z_p$ , which we call  $\phi_{\text{cut}}^{\text{rd}}(z)$  and  $n_g^{\text{rd}}$ . We find the best HOD fit  $M'_1$  each time, along with the corresponding derived parameters. Each redshift  $j$  bin in  $\phi_{\text{cut},j}^{\text{rd}}$  is drawn from a normal distribution with mean  $\phi_{\text{cut},j}$  and standard deviation as in Section 3.1 (see Fig. 5). The value for  $n_g^{\text{rd}}$  is produced in a similar manner; using a normal

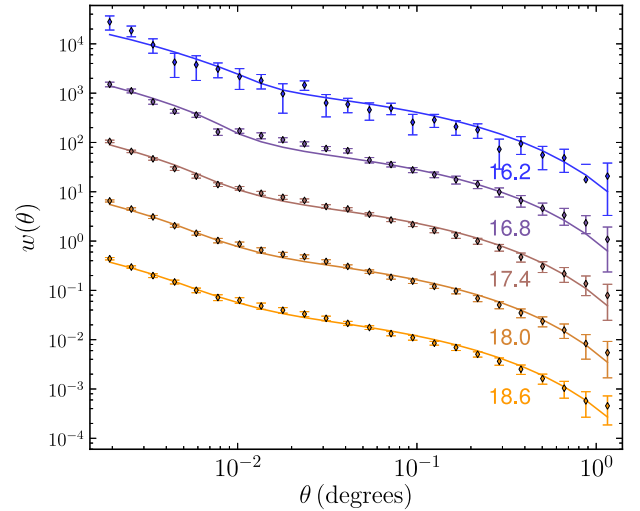

**Figure 9.** Observed ACF (points with error bars) of the samples  $15 < [4.5] < \{16.2, 16.8, 17.4, 18.0, 18.6\}$ . The solid curves correspond to the best model fits. An extra decade has been added between consecutive curves for easier visualization. The error bars are drawn from the diagonal elements of the covariance matrix (equation 16). In general, neighbouring points are positively correlated, while those far apart are anticorrelated. This is an inherent property of the ACF estimation (Norberg et al. 2001; Scranton et al. 2002), but can be effectively taken into account via a metric of the form of equation (24).

**Table 3.** Best-fitting SHMR parameters. Columns 1 and 2: SHMR functions (see equations 25–27) and parameters that describe them. Column 3: prediction of the parameter values at  $z = 1.5$ , derived by these authors using data from luminosity and stellar mass functions at different redshifts. Column 4: parameter values derived from fitting these functions to our clustering data at  $z = 1.5$ .

| Function                        | Parameter              | Prediction $z = 1.5$ | SSDF fit            |
|---------------------------------|------------------------|----------------------|---------------------|
| $S^M$<br>(Moster et al. 2013)   | $N^M$                  | $0.020 \pm 0.007$    | $0.0139 \pm 0.0003$ |
|                                 | $\log M_p^M$           | $12.31 \pm 0.32$     | $12.25 \pm 0.02$    |
|                                 | $\beta^M$              | $0.88 \pm 0.20$      | $1.64 \pm 0.09$     |
|                                 | $\gamma^M$             | $0.81 \pm 0.12$      | $0.60 \pm 0.02$     |
|                                 | $\log M_{\text{peak}}$ | 12.33                | $12.44 \pm 0.08$    |
| $S^B$<br>(Behroozi et al. 2013) | $\log e^B$             | $-1.70 \pm 0.16$     | $-2.03 \pm 0.17$    |
|                                 | $\log M_p^B$           | $11.88 \pm 0.13$     | $12.03 \pm 0.15$    |
|                                 | $\alpha^B$             | $-1.64 \pm 0.09$     | $-2.10 \pm 0.16$    |
|                                 | $\gamma^B$             | $0.12 \pm 0.25$      | $0.32 \pm 0.26$     |
|                                 | $\delta^B$             | $2.65 \pm 0.90$      | $3.31 \pm 1.15$     |
| $S^Y$<br>(Yang et al. 2012)     | $\log M_{\text{peak}}$ | 12.23                | $12.44 \pm 0.07$    |
|                                 | $\log M_0^Y$           | $9.57 \pm 0.31$      | $10.65 \pm 0.13$    |
|                                 | $\log M_p^Y$           | $10.48 \pm 0.22$     | $10.37 \pm 0.30$    |
|                                 | $\alpha^Y$             | $0.56 \pm 0.11$      | $0.16 \pm 0.04$     |
|                                 | $\beta^Y$              | $35 \pm 30$          | 100                 |
|                                 | $\log M_{\text{peak}}$ | 12.38                | $12.44 \pm 0.06$    |

distribution with mean and standard deviation equal to the value and error of  $n_g$  in Table 1. The scatter in all parameters from the random realizations is clearly dominant over that arising from the width of the  $M'_1$  likelihood in the fiducial fit, especially due to the variations in  $n_g$ . We can therefore approximate the final errors as those from the random realizations.

Fig. 9 shows the observed ACF and the model fits for a few samples. The values and errors for all relevant parameters are given in Table 3.

## 7 THE STELLAR-TO-HALO MASS RATIO

Halo masses equal to  $M_{\min}$  host on average 0.5 central galaxies with luminosities greater than the sample threshold (equation 17). Zheng et al. (2007) showed analytically that central galaxies living in these particular haloes have a median luminosity corresponding to the limit of the sample. This links halo masses with luminosities, albeit with some scatter  $\gtrsim 0.15$  dex (Zehavi et al. 2011; Coupon et al. 2012). However, we are interested in the connection with stellar masses, which also have a well-defined mean and scatter at fixed luminosity (see Section 3.3). Hence, we can link  $M_{\min}$  to  $M_{\star}^{\text{lim}}$ , with a scatter ( $\sigma_{\log M}$ ) that ought to be close to the quadratic sum of the scatters from the luminosity– $M_{\min}$  and luminosity– $M_{\star}^{\text{lim}}$  relations. We measure the latter to be around 0.2 dex, and the former is expected to be similar. Thus, the fact that we fix  $\sigma_{\log M} = 0.2$  might seem an underestimation. However, as we will discuss in Appendix F, an unconstrained HOD fit does not prefer larger values for this parameter. Also, the final results do not change significantly by increasing it to larger values as 0.4 dex. We thus retain our choice and proceed.

The values of  $\bar{M}_{\star}^{\text{lim}}$  and  $M_{\min}$  for our samples can be found in Table 1. Their ratio yields the SHMR, which is plotted as a function of halo mass in Fig. 10 for our different sets of stellar masses. The vertical error bars are a combination of the halo mass uncertainty and the error in the median stellar masses (equation 10), i.e. it does not represent the scatter in stellar mass at fixed halo mass. It is interesting that the error bars do not get notably bigger for brighter samples, even though the ACFs of those are much noisier and the stellar mass errors are indeed larger. The reason is that  $M_{\min}$  becomes progressively less sensitive to the HOD fit at higher luminosities. The fit is based on  $M_1^Y$ , which falls close to the steep drop of the halo mass function (equation D1) in the bright samples

and makes the overall HOD model be weakly affected by the satellite occupation (e.g. equation D7). Thus, the error contribution from  $M_1^Y$  is minimized, and that from  $n_g$  and  $M_{\star}^{\text{lim}}$  increases, keeping the total error roughly constant across the different samples.

### 7.1 Comparison to other results at $z = 1.5$

There are several studies that have tried to constrain the SHMR at  $z > 1$ , based on abundance matching (Behroozi et al. 2013; Moster et al. 2013), HOD modelling (Zheng et al. 2007; Wake et al. 2011; Coupon et al. 2012) and extensions using conditional luminosity functions (Yang et al. 2012; Wang et al. 2013). Some of these works also provide their own parametric form for the SHMR as a function of halo mass, and we will use three of them to fit our points. These are the forms from Yang et al. (2012), Moster et al. (2013) and Behroozi et al. (2013) (hereafter Y12, M13, B13, respectively), which read

$$\mathcal{S}^Y(m) = M_0^Y \left( \frac{m}{M_p^Y} \right)^{\alpha^Y + \beta^Y} \left( 1 + \frac{m}{M_p^Y} \right)^{-\beta^Y}, \quad (25)$$

$$\mathcal{S}^M(m) = 2N^M \left[ \left( \frac{m}{M_p^M} \right)^{-\beta^M} + \left( \frac{m}{M_p^M} \right)^{\gamma^M} \right]^{-1} \quad (26)$$

and

$$\log \mathcal{S}^B(m) = \log(\epsilon^B M_p^B) + f \left( \log \frac{m}{M_p^B} \right) - f(0) - \log(m) \quad (27)$$

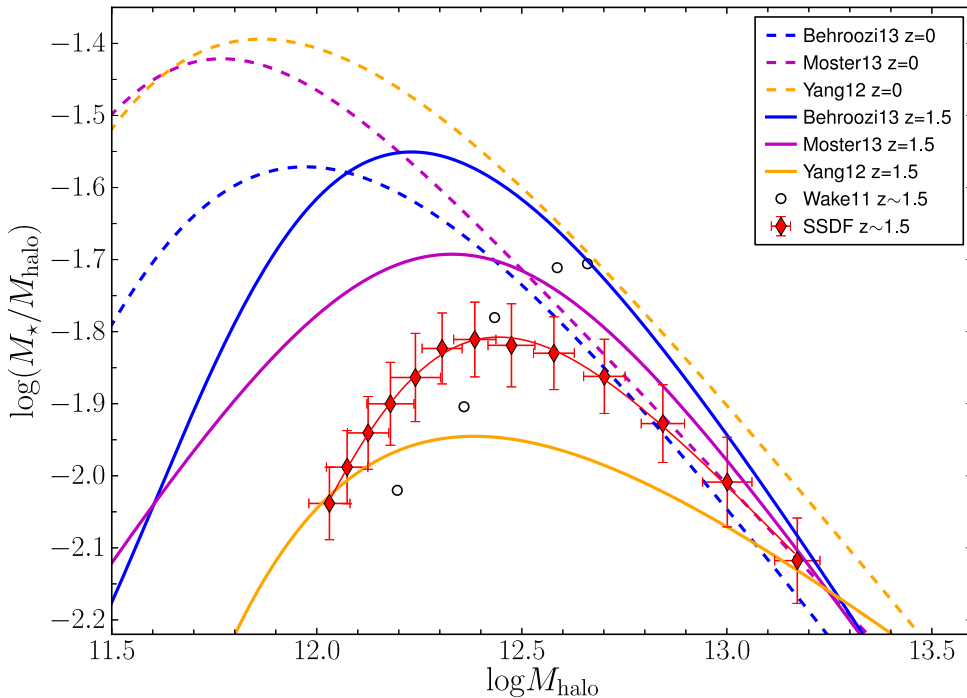

**Figure 10.** SHMR from our study and predictions from other authors. The dashed and solid lines are predictions at  $z = 0$  and  $1.5$ , respectively. Our points are plotted as  $\log(\bar{M}_{\star}^{\text{lim}}/M_{\min})$  versus  $\log M_{\min}$ . The error bars are strongly correlated between neighbouring points, since our galaxy samples are defined in cumulative magnitude bins. We fit the parametrizations from those authors to our data, robustly measuring a maximum at  $\log M_{\text{peak}} = 12.44 \pm 0.08$ . This characteristic mass scale is  $\sim 4$  times larger than what is found at  $z = 0$ . The M13 fit is shown as the thin red curve. We also include data from Wake et al. (2011) as empty circles, where their M05-based stellar masses have been increased by 50 per cent to approximately match the BC03 masses used by other authors.



with

$$f(x) = -\log(1 + 10^{\alpha^B x}) + \frac{\delta^B [\log(1 + \exp(x))]^{\gamma^B}}{1 + \exp(10^{-x})}. \quad (28)$$

The superscript labels  $\{Y, M, B\}$  refer to the author names. The position of the peak is mostly modulated by the pivot mass  $M_p^{Y,M,B}$ . In Y12 and M13, the low-mass logarithmic slopes are set by  $\beta^M$ ,  $\alpha^Y + \beta^Y - 1$  and the high-mass slopes by  $\gamma^M$ ,  $\alpha^Y - 1$ , respectively. In the case of B13, the link between the slopes and the parameters is less straightforward, but the low- and high-mass regimes are mostly modulated by  $\alpha^B$  and  $\delta^B$ .  $\gamma^B$  tunes the high-mass behaviour of  $\log S^B(m)$  going from logarithmic at  $\gamma^B = 0$  to power law at  $\gamma^B = 1$  (see B13). We set all of these parameters free while performing orthogonal regression fits of  $S^{Y,M,B}$  to our measurements of the SHMR. However, we do enforce  $\gamma^B \leq 1$  and  $\beta^Y \leq 100$  (see Y12), which are limits by definition.

These authors mainly use measures of the stellar mass functions at different redshifts to build a redshift evolution model of the SHMR. They provide explicit redshift dependence for all parameters in equations (26) and (27). Thus, we use them to compare our measurements to the predicted SHMR of these authors at the redshift of our survey. This is shown in Fig. 10, where we plot their predictions at low and high redshift. In addition, the specific parameter values of the  $z = 1.5$  curves, for both the predictions and the fits to our data, are displayed in Table 3. The normalization values  $N^M$ ,  $\log \epsilon^B$  and  $\log M_0^Y$  are also fitted, although we disregard any interpretation of them because there are important systematic uncertainties in the stellar masses between different authors. A thorough examination of these to allow a meaningful comparison is beyond the scope of this paper. For the current purposes, we simply assume that the differences in stellar masses are due to a simple logarithmic offset. This assumption holds well when comparing different sets of masses in the COSMOS and EGS catalogues. In addition, M13 and B13 use stellar masses based on BC03 and Chabrier IMF, which matches our fiducial choice of masses. Y12 use masses produced with the Fioc & Rocca-Volmerange (1997) models and Kroupa IMF, but we still do not expect a significant deviation from a constant offset when compared to our masses (Barro et al. 2011b). We have checked this based on the masses from this particular model that are also available in the EGS control catalogue. We also note that we use the SHMR in Y12 that is based on fits ‘CSMF/SMF1’, where only stellar mass functions are utilized.

We limit the comparison between all measurements to the centroid position and slopes of the SHMR. There are some discrepancies when comparing our results to the predictions from the other authors, but these are not dramatic (see below). The centroid of the SHMR is computed as the actual peak position in the parametric relations, and the fits of these models to our data show  $\log M_{\text{peak}} = 12.44 \pm 0.08$  (see Table 3). We did not compute confidence intervals for the  $M_{\text{peak}}$  predictions because it requires knowledge of the explicit covariance between their parameters fits. Our value is larger than these predictions; based only on our errors, it lies  $0.8\sigma$  above Y12,  $1.2\sigma$  above M13 and  $2.7\sigma$  above B13. Because their errors are not being taken into account, these offsets should not be treated as absolute levels of inconsistency with respect to our study.

For the slopes, there are also some slight discrepancies. To better visualize this comparison, we have plotted in Fig. 11 the prediction and the fits to our data for each parametric model. All curves in each panel are scaled in the  $x$ -axis to match the peak of the prediction, and scaled in the  $y$ -axis to set all peak heights to zero. The idea is to fix the peak position (in both axes) of all curves to better compare

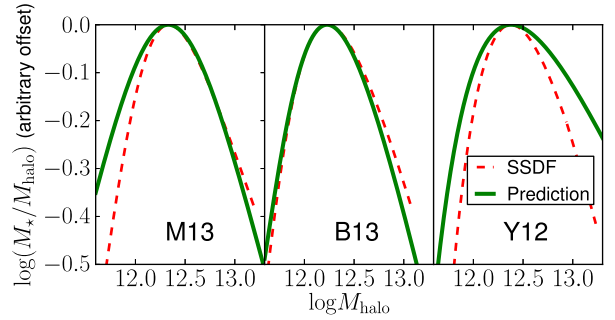

**Figure 11.** Comparison of the high- and low-mass slopes between model predictions  $\{M13, B13, Y12\}$  at  $z = 1.5$  and the fits of their parametric models to our data. In each panel, we have offset all curves to the same peak value and shifted our curves in mass to match the peak position of the prediction. This has been done to help the eye in comparing the slopes at either side of the peak. Our data show a moderate discrepancy compared to the predictions.

the slopes on either side. In this case, the *slopes* are the approximate power-law index at either side of the peak, and is not necessarily linked to a parameter in a unique manner (except for M13, where the slopes are independently controlled by  $\beta^M$ ,  $\gamma^M$ ). In comparison to M13, our low-mass slopes are steeper (higher  $\beta^M$ ) and the high-mass slopes are shallower (lower  $\gamma^M$ ) than their predictions. With respect to B13, the low-mass slopes are in agreement but our high-mass slopes are shallower. In the case of Y12, our slopes are steeper at both low and high mass.

As explained in Section 1, the low-mass slope can be directly related to the importance of energy- versus momentum-driven winds. In general, we find a steeper low-mass slope than the predictions, which favours energy-driven winds. At high masses, the interpretation of the slope is less clear, since AGN feedback and galaxy mergers should also have an important contribution.

Another important study to compare our measurements with is Wake et al. (2011). It is based on HOD modelling of  $\sim 10^{10} M_{\odot}$  stellar mass limited galaxies at  $z \sim 1.5$ , which makes it similar to our work. These authors had the advantage of using data with accurate photometric redshifts and stellar masses, but also the drawback of sampling a small region of the sky (NEWFIRM survey,  $0.25 \text{ deg}^2$ ). They had very few galaxies around  $10^{11} M_{\odot}$  and therefore it was not possible to map the full peak of the SHMR. Their data are shown in Fig. 10, where we have scaled the stellar masses by 50 per cent to roughly transform them from the Maraston (2005, hereafter M05) model to BC03. These authors performed a parametric fit and found a peak at  $\log M_{\text{peak}} = 12.63$  (an estimated uncertainty was not provided), which lies  $2.5\sigma$  above our result of  $12.44 \pm 0.08$ .

## 7.2 Evolution with redshift

At this point, we can compare our result for the peak in the SHMR with other studies at different epochs and trace its evolution with redshift (Fig. 12). We include HOD results from Zehavi et al. (2011), Zheng et al. (2007), Leauthaud et al. (2012), Coupon et al. (2012) and Wake et al. (2011), as well as predictions from M13, B13 and Y12. As mentioned earlier, our peak lies above the predictions and below the value inferred by Wake et al. (2011). Looking at the trend with values at other epochs, the peak mass seems to have evolved in a monotonic and quasi-linear way with redshift. Our data support a change of  $\log M_{\text{peak}} = 12.44 \rightarrow 11.8$  through  $z = 1.5 \rightarrow 0$ . This means that the halo mass scale that is most efficient at forming and accreting stars to the central galaxy has decreased by a factor

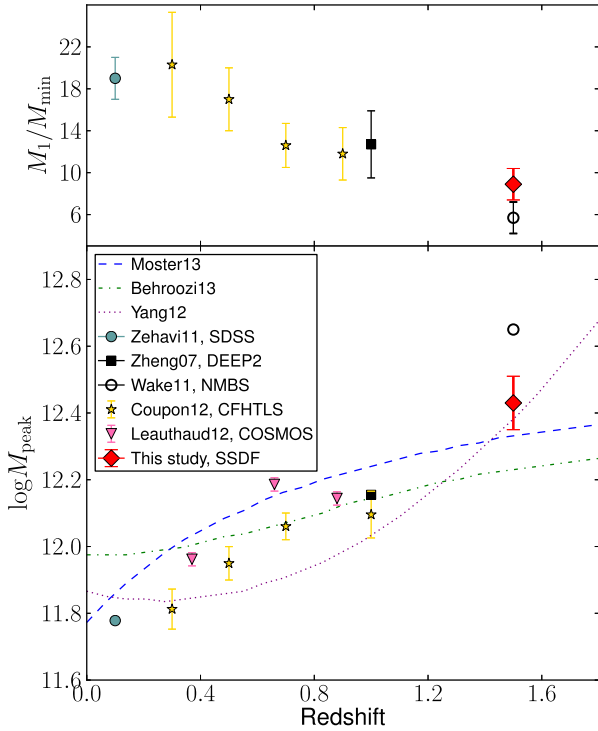

**Figure 12.** Top: evolution in the  $M_1/M_{\min}$  ratio for samples with density  $n_g = 10^{-3} \text{Mpc}^{-3}$ , collected from different HOD studies. A decline in this ratio with redshift is measured consistently and agrees with results from  $N$ -body simulations. The basic interpretation is that at high redshift there is a larger rate of halo infall, which increases the fraction of similar mass galaxies and reduces  $M_1/M_{\min}$  (see the text). Bottom: evolution in the peak halo mass of the SHMR. Our results show that  $M_{\text{peak}}$  has decreased by a factor of 4.5 through  $z = 1.5-0$ . In combination with other HOD measurements (points), the evolution seems to be monotonic. The curves show predictions from conditional luminosity function and abundance-matching studies.

of 4.5 during this redshift range. Thus, the downsizing trend of galaxies has continued steadily during the last 10 Gyr. Low-mass galaxies have grown faster than their haloes, while the opposite trend happened for high-mass galaxies.

## 8 SATELLITE GALAXIES

### 8.1 Satellite fraction

The satellite fractions for all of our samples are displayed in Table 1 and plotted in the lower panel of Fig. 13. Note that the satellites making up this fraction are above the sample flux limit, i.e.  $f_{\text{sat}}$  does not refer to the total fraction of satellites that a central galaxy at the flux limit has. The satellite fraction clearly decreases towards the brighter end, which is a manifestation of the drop in the halo mass function. Based upon the model we use,  $M_1$  is the scale that sets the occupation number of satellites in a halo of a given mass, and the number of such haloes is given by the mass function. If  $M_1$  approaches the cutoff scale of the mass function, then the satellite contribution to the total density will be reduced compared to that of central galaxies. This effect is seen in most studies (Zheng et al. 2007; Wake et al. 2011; Zehavi et al. 2011; Coupon et al. 2012; Tinker et al. 2013).

Our faint-limit value is  $f_{\text{sat}} \sim 0.2$  (see Fig. 13). Compared to the results of  $f_{\text{sat}} \sim 0.3$  obtained at  $z = 0$  by Zehavi et al. (2011), our value is suggestive of a mild increase in the satellite fraction with

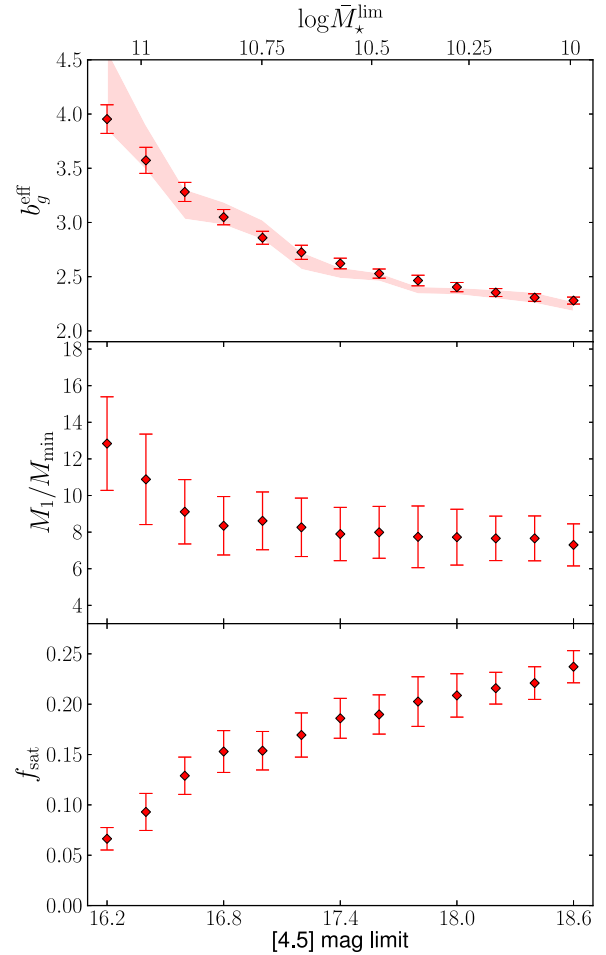

**Figure 13.** Results from the HOD fits. Each point denotes a sample defined by a limiting apparent magnitude threshold, which is associated with the median stellar mass  $\bar{M}_*^{\text{lim}}$ . In the top panel, the shaded region represents the  $\pm 1\sigma$  interval of direct large-scale bias fits. These are consistent with the HOD bias.

cosmic time. A similar conclusion was also reached by Coupon et al. (2012) based on their comprehensive study of samples at  $0 < z < 1$ , and such evolution is predicted by some simulations (e.g. Wetzel, Cohn & White 2009; Wetzel et al. 2013). We caution, however, that the sample in Zehavi et al. (2011) extends to fainter absolute magnitudes than our data set ( $M^* + 2.4$  versus  $M^* + 1.2$ ), and so the evidence from this comparison is suggestive rather than conclusive.

### 8.2 The $M_1/M_{\min}$ relation

A deeper insight into the relationship between haloes and their satellites is given by the  $M_1/M_{\min}$  ratio. As mentioned in previous sections, haloes typically become occupied by a central galaxy at  $M_{\min}$  and gain an additional satellite at  $M_1$ . Thus, at fixed  $M_{\min}$ , lowering  $M_1$  would directly increase the overall satellite fraction. However,  $M_1/M_{\min}$  holds further clues in relation to the galaxies that occupy these haloes. Because of the decline in the halo mass function towards the massive end, most of the haloes are small and have masses around  $M_{\min}$ . These will typically host galaxies that are also small, with stellar mass close to the sample limit  $\bar{M}_*^{\text{lim}}$ . The satellites considered have masses that are also near this limit and living in haloes near  $M_1$ , where the central galaxy can have a mass much larger than  $\bar{M}_*^{\text{lim}}$ . However, if  $M_1$  approaches  $M_{\min}$ , then

its central galaxy will have a mass closer to  $\bar{M}_*^{\text{lim}}$ . In the case of  $M_1/M_{\text{min}} \gtrsim 1$ , the satellite will have a stellar mass around  $\bar{M}_*^{\text{lim}}$  and the central will be slightly more massive than that. Thus, when this ratio is smaller, there is an increased fraction of centrals that have a satellite of similar stellar mass.

In the local Universe,  $M_1/M_{\text{min}} \approx 17$  (Zehavi et al. 2011; Beutler et al. 2013). On the other hand, we measure  $M_1/M_{\text{min}} \approx 9$  at  $z = 1.5$ . A decline of this ratio with redshift had been predicted by simulations (Kravtsov et al. 2004; Zentner et al. 2005) and measured by abundance matching (Conroy et al. 2006) and other HOD studies. Ratios at different redshifts and fixed number density  $n_g = 10^{-3} \text{ Mpc}^{-3}$  are shown in the top panel of Fig. 12, where it can be seen that there is a general increase towards later times. The reason why both  $f_{\text{sat}}$  and  $M_1/M_{\text{min}}$  are higher at low redshift is due to the evolution of the mass function. At low redshift, there are very large haloes that can host multiple satellites, which helps increase the average satellite fraction. However, the fraction of galaxies that are satellites with masses close to the limit of the sample is still larger at high redshift. This happens because the halo infall time-scale is lower, which enhances their accretion rate on to other structures and reduces the gap between  $M_1$  and  $M_{\text{min}}$  (see below and Conroy et al. 2006).

However, the most interesting result we derive is the trend of  $M_1/M_{\text{min}}$  with sample luminosity. The middle panel of Fig. 13 shows indications of a slight rise at high luminosities, which is not obviously expected. At  $z \lesssim 1$ , this ratio has been observed to be constant or decrease with increasing luminosity at fixed redshift (Zheng et al. 2007; Blake et al. 2008; Abbas et al. 2010; Matsuoka et al. 2011; Zehavi et al. 2011; Leauthaud et al. 2012; Beutler et al. 2013). Simulations also predict that the accretion rate is larger for more massive haloes at all times (Zentner et al. 2005; Fakhouri & Ma 2008; McBride, Fakhouri & Ma 2009; Wetzel et al. 2009; Fakhouri et al. 2010), which would lower  $M_1/M_{\text{min}}$  at the bright end. We measure the opposite trend at  $z = 1.5$ . Interestingly, Wake et al. (2011), the only other study at this redshift that measured HOD for stellar mass selected samples, also obtained a slight increase of this ratio with sample mass. However, those authors did not explore this effect in depth. The results from Coupon et al. (2012) also hint a similar trend at  $z < 1$  in haloes of mass  $< 10^{13} M_{\odot}$ , although they are consistent with a constant ratio.

In order to better compare the results from a few different authors, we plot  $M_1/M_{\text{min}}$  as a function of cumulative number density in Fig. 14. For visual clarity, we show in the left- (right-)hand panel those results that follow an increasing (decreasing) trend with density, along with our data. A caveat in this comparison is that, in reality, the number density of a given population does not remain constant through redshift. However, the data from Zheng et al. (2007) and Coupon et al. (2012) do not follow the same trends, even though they sample similar redshifts. Thus, from the observational side, the  $0 < z < 1$  data do not offer a consensus regarding the trend with luminosity. At  $z = 1.5$ , our results and those from Wake et al. (2011) do support a minimal rise in  $M_1/M_{\text{min}}$  with luminosity.

As shown in Fig. 14, two families of curves can be defined. Our results, Wake et al. (2011) and Coupon et al. (2012) show a similar shape, offset in the y-axis according to redshift. Meanwhile, Zehavi et al. (2011) and Zheng et al. (2007) are similar to one another. One possible effect leading to the disparity between the two sets of results may be the particular selection of galaxy samples. Those in Zehavi et al. (2011), Zheng et al. (2007) and Coupon et al. (2012) are limited by absolute magnitude in the optical. Wake et al. (2011) select directly in stellar mass, and we make a luminosity selection that is later matched to a stellar mass limited sample.

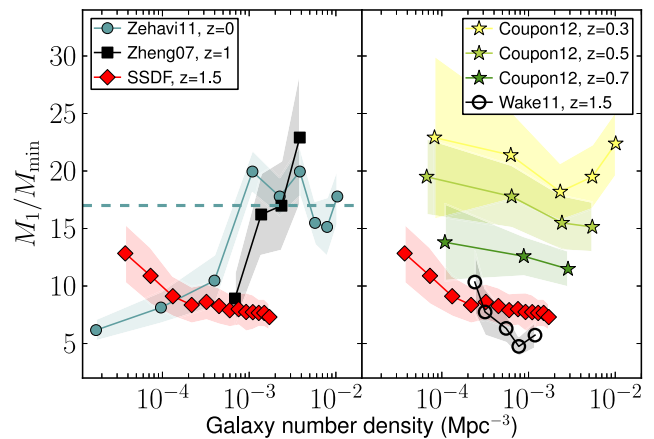

**Figure 14.** Ratio between  $M_1$  and  $M_{\text{min}}$  as a function of cumulative galaxy number density. We compare our data (red points) with other studies, grouping them in those showing a decrease (left-hand panel) or an increase (right-hand panel) with number density. The dashed line indicates the ratio of 17 presented in Zehavi et al. (2011) as the typical value for low-redshift galaxies.

Thus, we find no clear explanation for the existence of these two families of curves regarding sample selection. In addition, all these authors (including us) use a very similar form of the HOD, and variations in the chosen cosmology do not have such a strong impact. Regarding possible systematics effects in our modelling, we test different possibilities in Appendices F and E and find nothing that would alter our conclusions.

### 8.3 Physical mechanisms for a mass-dependent evolution

The rise of  $M_1/M_{\text{min}}$  with luminosity is not clearly detected. However, Zehavi et al. (2011) and Zheng et al. (2007) very clearly measure the opposite behaviour at redshifts  $z = 0$  and 1, respectively, so that even if our data follow a flat trend at  $z = 1.5$ , it would imply that evolution has taken place. Interestingly, there is no obvious mechanism that could be responsible for this change, and we speculate with some possibilities in what follows. The dynamical processes at play can be reduced to a competition between accretion and destruction of satellites. Regarding the former, big structures have recently assembled a larger fraction of their mass than smaller counterparts, at all times (Wechsler et al. 2002; Zentner et al. 2005; Fakhouri et al. 2010). In other words, the specific growth rate of haloes is an increasing function of mass. Regarding the latter, the dynamical time in bigger haloes is larger, contributing to a slower destruction of accreted satellites. These effects yield a larger number of recently accreted and undisrupted satellites in larger haloes, which would produce a decrease in  $M_1/M_{\text{min}}$  towards higher masses.

So, what additional mechanism can reverse this trend at high redshift? This mechanism could involve the ratio of destruction to accretion being larger at high masses, which is possible if the dynamical time-scale decreases considerably with mass. However, a caveat in these scenarios is that we are implicitly considering that galaxies are accreted or disrupted in the same way as haloes, which does not have to hold. What we are really tracking are galaxies, since  $M_1/M_{\text{min}}$  is inversely proportional to the occurrence of galaxy pairs with masses close to the sample limit. Thus, there could be a star formation dependent process that drives the trend we see with stellar mass. For example, Wetzel et al. (2013) show that the star formation in satellites fades at the same rate as the central

galaxy for a few Gyr after accretion, but then undergoes a rapid quenching period. They find that quenching time-scale is shorter for more massive satellites. Thus, if the central galaxy outgrows the satellites in a way proportional to its own mass, this would produce a lower fraction of similar mass pairs and play in favour of our trend. In addition, such a mechanism would need to become milder towards low redshift, so that the trend becomes inverted. This allows us to restate our previous question: what physical process would more efficiently quench satellites in similar mass pairs and is more important at high redshift? We do not have a plausible answer for this question.

## 9 GALAXY BIAS

At small scales, the complex baryonic processes of galaxy formation break the homology between the spatial distribution of galaxies and dark matter. However, at large scales, the gravitational effects of dark matter dominate the dynamics and the overdensity of some selection of galaxies is expected to match that of dark matter multiplied by a scaling factor, the galaxy bias  $b_g$ . In the HOD models, this quantity is described as a number-weighted average of the halo bias (see equation 20) and ideally would match the square root of the ratio between the large-scale SCF of galaxies and dark matter (equation 1).

Our measurements of the effective galaxy bias are shown in the top panel of Fig. 13, where we plot against apparent magnitude threshold. Bright (massive) galaxies have a larger bias than faint (small) ones, a trend that has been determined in many other studies (Benoist et al. 1996; Norberg et al. 2001; Tegmark et al. 2004; Zehavi et al. 2005; Brodwin et al. 2008; Brown et al. 2008; Foucaud et al. 2010; Zehavi et al. 2011; Matsuoka et al. 2011; Coupon et al. 2012; Jullo et al. 2012; Beutler et al. 2013; Mostek et al. 2013) and is expected because luminous galaxies reside on average in more massive haloes, which are more biased with respect to dark matter (White et al. 1987; Kauffmann et al. 1997). In addition to  $b_g^{\text{eff}}$ , we also fit the large-scale bias directly to our measured ACF at  $\theta > 0:05$  ( $\gtrsim 4$  comoving Mpc at  $z = 1.5$ ). This fit does not depend on the HOD, and is performed by scaling the dark matter SCF in a similar way to the procedure in Section 5.2, but leaving the  $z = 1.5$  bias as a free parameter. The inputs from the galaxy population are the redshift distributions and the evolution in the median mass to modulate the bias across redshifts, but not the galaxy number density. The shaded regions in the top panel of Fig. 13 represent the  $\pm 1\sigma$  confidence intervals for the direct bias fit, which is in good agreement with the HOD values. Thus, we find that the HOD modelling of our data makes a good description of the large-scale bias.

Nonetheless, we note that this description is not perfect. In Appendix F, we comment on how a HOD fitted with all parameters allowed to vary freely makes  $\sigma_{\log M}$  float down to unphysical values  $\simeq 0$ , trying to maintain a high bias that otherwise would yield a smaller value due to small shifts in the fitted  $M_{\min}$  and  $n_g$ . The overall HOD is not very sensitive to  $\sigma_{\log M}$  and therefore this is not a significant problem. However, it points towards the amplitude of our observed ACFs being slightly too large to be perfectly reproduced by the combination of halo bias and halo mass functions.

### 9.1 Comparison to Wake et al. (2011)

We find a slight bias excess in our data, a result that has been noted to a larger extent in other HOD studies of stellar mass limited samples at  $1 < z < 2$ . Matsuoka et al. (2011) and Wake et al. (2011) find

that their ACFs are too strong to be reproduced by a halo model with the observed density of galaxies. Those fits to the clustering plus density were compared to fits to the clustering only, where the number density was not fixed to the observed value. The latter fit was able to reproduce the ACFs, but with a bias about 50 per cent higher than the clustering plus density fit in their most massive and distant samples. The  $z = 1.5$  samples of Wake et al. (2011) are directly comparable to our study, since they are defined by lower stellar mass limits. In the lower panel of Fig. 15, we show our standard HOD bias measurements as a function of stellar mass and the bias results from those authors. To make the comparison more direct, we plot our results for the M05 evolutionary models with the Kroupa (2001) IMF. Here, we comment on the two types of HOD fits in Wake et al. (2011), and how they compare to our results.

(i) Clustering only: Wake et al. (2011) find the effective bias from this fit to be the closest to a direct measurement of the large-scale bias. However, these values are high compared to our findings. The 0.2 dex offset relative to our work could be due to a difference in stellar mass estimates (Fig. 15). Given that both studies employ very similar stellar mass models (M05 stellar grids, Kroupa IMF and Calzetti 2000 extinction), this possibility seems unlikely. Another explanation would be sample variance due to the small size of the survey in Wake et al. (2011), which could lead to an excess in the

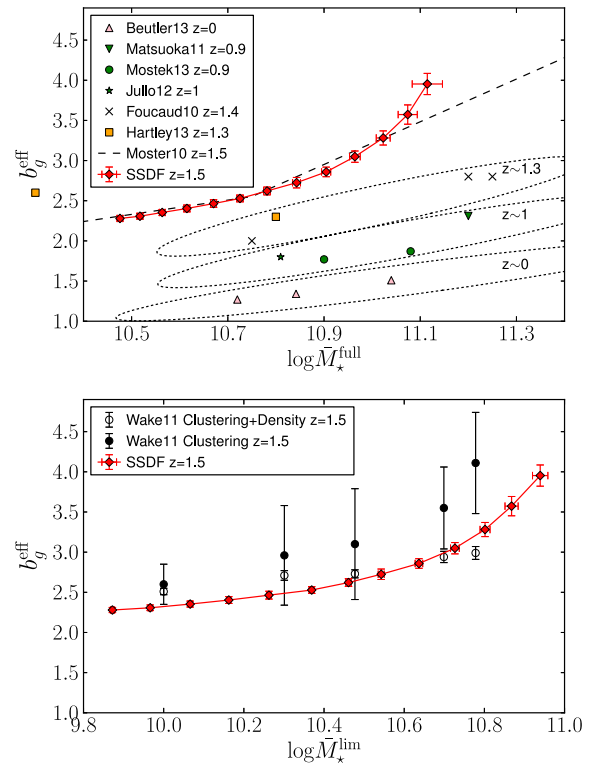

**Figure 15.** Top: comparison of our HOD bias with other values from the literature, as a function of stellar mass. There are some differences in the way masses from the other studies are defined, but in general they represent the median stellar mass of a given sample. For this reason, we show  $\bar{M}_*^{\text{full}}$  instead of  $\bar{M}_*^{\text{lim}}$ . We use BC03/Chabrier IMF stellar masses, as do most of the other authors. We note the increase of bias at fixed stellar mass as a function of redshift. Bottom: comparison of our HOD bias with Wake et al. (2011) as a function of stellar mass limit. For more direct comparison between the results, here we model our galaxies with M05/Kroupa IMF. The clustering-only fits of these authors yield considerably larger bias values than ours, but this might be due to sample variance in their survey (see the text).



clustering signal. Our survey is almost 400 times larger in area and therefore significantly less impacted by this effect.

(ii) Clustering + density: Wake et al. (2011) find biases from this fit that are also not fully consistent with ours. Their bias is larger (smaller) than our values in the low- (high)-mass end. However, the observed number densities are discrepant in the opposite way, and the stellar mass at which the densities and biases match is roughly the same,  $\log M_{\star}^{\text{lim}} \sim 10.6$ . In any HOD model, the effective bias is anticorrelated with number density if the rest of the parameters are held fixed. Thus, if Wake et al. (2011) and our study had the same observed densities, the HOD bias from both surveys could perhaps be in full agreement.

Thus, we speculate that the high clustering amplitude in Wake et al. (2011) might be predominantly a consequence of cosmic variance (as also suggested by those authors), and their clustering + density HOD fits would be consistent with ours if the observed  $z \sim 1.5$  comoving number densities were the same.

## 9.2 Comparison to other studies

We also compare our bias results with other measurements at different redshifts based on stellar masses in the top panel of Fig. 15. These studies include M10, Foucaud et al. (2010), Matsuoka et al. (2011), Jullo et al. (2012), Hartley et al. (2013), Mostek et al. (2013) and Beutler et al. (2013). The comparisons are less straightforward than with Wake et al. (2011), since there are some differences with the stellar mass models used by each author. In addition, the selection is not always done with stellar mass lower limits, but in stellar mass ranges. Thus, we choose to plot the bias against the median stellar mass of the full galaxy samples. We show our results with BC03 and Chabrier IMF masses, since this is the most common choice among the other authors.

At fixed stellar mass, the bias increases with increasing redshift. This result has also been shown in most studies that use multiredshift data (Foucaud et al. 2010; M10; Ross et al. 2010; Matsuoka et al. 2011; Wake et al. 2011; Jullo et al. 2012; Hartley et al. 2013). Such behaviour is expected from analytical derivations (Fry 1996; Moscardini et al. 1998) and can be qualitatively understood if we assume that most of the galaxies are formed around a particular redshift and at high density peaks in the dark matter distribution. Such galaxies would then be initially very biased, but with time their spatial distribution would relax to match that of dark matter. Thus, the bias is generally expected to evolve towards lower values.

M10 do not use clustering measurements, but an abundance-matching technique based on the stellar mass functions. They provide predictions of the galaxy bias for several redshifts and stellar mass ranges. We have plotted an interpolation of these values in the top panel of Fig. 15, taking the middle point of their mass ranges as the effective median mass. Overall, there is a good agreement with our results.

## 9.3 Bias of central galaxies

Ideally, one would like to predict the bias of an individual galaxy based on its stellar mass. However, this is not possible because there is some intrinsic scatter (represented by the HOD fudge parameter  $\sigma_{\log M}$ ) related to other physical processes that might also intervene, such as environment or assembly history. In addition, there can be ensemble scatter, which arises if the bias and mass are drawn from population averages. This is what we have done so far in this work, establishing a connection between the effective bias and the

median mass of a given sample (see Table 1), which are moments of broad mass distributions. Thus, we wish to reduce the amount of ensemble scatter in the bias-stellar mass mapping, which can be done straightforwardly by considering the bias of central galaxies. Basically, we exploit the connection outlined in Section 7, where central galaxies with stellar mass  $\bar{M}_{\star}^{\text{lim}}$  typically occupy haloes of mass  $M_{\text{min}}$ . Therefore, the bias of such galaxies can be computed as  $b_c(\bar{M}_{\star}^{\text{lim}}) = b_h(M_{\text{min}})$ . Here, there is no averaging over halo masses and the stellar mass distribution is less broad than that of the full galaxy samples. We fit a fourth order polynomial to our results and thus provide a functional form of the bias of central galaxies as a function of the stellar mass logarithm  $m$ :

$$b_c(m) = 1.6 + p_1(m - 9.8) + p_2(m - 9.8)^2 + p_3(m - 9.8)^3 + p_4(m - 9.8)^4, \quad (29)$$

$$p = [0.22 \pm 0.07, 1.38 \pm 0.38, -2.79 \pm 0.62, 2.23 \pm 0.31],$$

which is valid over the range  $9.8 < m < 11$ .

## 10 SUMMARY

We use a recently completed *Spitzer*-IRAC survey over 94 deg<sup>2</sup> to study the relation between dark matter and galaxies through their angular two-point clustering. Our data allows us to select galaxies at  $z \sim 1.5$  with stellar masses in the range  $10^{10}$ – $10^{11} M_{\odot}$ . In order to derive stellar mass and redshift distributions, we employ the optical+MIR data from the COSMOS field (Muzzin et al. 2013b) as a reference catalogue, adapting it to the photometry of our survey. Then, we develop a statistical method that links sources between the SSDF and the reference catalogue by matching their IRAC photometry, accounting for the relative photometric errors in both data sets. We are able to infer with high confidence the distribution of stellar mass and redshift in the SSDF for a particular IRAC selection. IRAC magnitudes and colours are well correlated with these quantities for galaxies in the range of  $1 < z < 2$ .

The ACFs are fitted with an HOD model, which offers physical insight into the relationship between dark matter haloes and the galaxies they host, both centrals and satellites. Our main results are as follows.

(i) We fully map the SHMR across its peak, which lies in the middle of the mass range we probe. The halo mass at the peak is found to be  $\log M_{\text{peak}} = 12.44 \pm 0.08$ . This is 4.5 times higher than what is found at  $z \sim 0$ , supporting the trend of ‘archaeological downsizing’ since  $z = 1.5$ . An evolving quenching mass scale  $M_q$  related to  $M_{\text{peak}}$  could be responsible for this effect.

(ii) We compare our SHMR curves with the predictions from other authors at  $z = 1.5$ . Our results show a higher  $M_{\text{peak}}$  than Y12, M13 and B13. The low- and high-mass slopes of the relation are more consistent with M13 and B13 than Y12. In particular, we measure a slightly steeper low-mass slope than these predictions, which could support a large contribution from energy-driven winds in low-mass galaxies.

(iii) The effective bias of galaxies is in the range 2–4 for galaxies of stellar mass  $10^{10}$ – $10^{11} M_{\odot}$ , respectively. This is in good agreement with an HOD-independent fit of the large-scale bias. When compared to low-redshift studies, we find that at fixed stellar mass the bias decreases with time, in agreement with expectations from theory. We also provide a fitted form of the bias of central galaxies as a function of stellar mass. This relation suffers less from ensemble scatter than one that uses the sample average of the bias,  $b_g^{\text{eff}}$ .

(iv) The satellite fraction is  $\sim 0.2$  for galaxies of stellar mass  $M_* \sim 10^{10} M_\odot$  and decreases towards the high-mass end. In comparison to the higher fractions  $\sim 0.3$  measured at low redshift (Zehavi et al. 2011, with the caveat that the two studies extend to different absolute magnitudes), this agrees with the hierarchical CDM scenario, where with time there are bigger virialized structures that can host multiple satellites.

(v) We find mild evidence of an increase of  $M_1/M_{\min}$  in more massive samples. This is at odds with what is generally found at lower redshifts (e.g. Zheng et al. 2007; Zehavi et al. 2011) and predicted by some simulations (Wechsler et al. 2002; Zentner et al. 2005; Wetzel et al. 2009). If true, this effect implies that at  $z = 1.5$  the overall fraction of  $M_* \sim 10^{11} M_\odot$  galaxies in similar mass pairs is smaller than at lower masses. We do not find a clear reason for this trend.

Regarding possible systematic effects in our treatment, we stress that our results are robust. In general, we have not found that any of the choices we have made about the fitting parameters or overall HOD model would make a qualitative difference in our conclusions. Fixing a different number of parameters or allowing for a differential evolution between the one- and two-halo terms does not produce significant changes. This is in part due to the strong constraint placed by the observed galaxy number density, which is the main driver for setting  $M_{\min}$  and the bias. In addition, if the prior on the density is dropped, the results become naturally more noisy but still consistent with our fiducial model. As explored in Appendix B, our results are also robust with the use of either COSMOS or EGS data sets as the reference catalogue, even though the photometry and data products in those surveys were generated in very different ways. This fact strongly supports the robustness of our methods and conclusions.

In the near future, deep optical catalogues in the SSDF field will be available from the Dark Energy Survey. Combining such data with the IRAC catalogues used in this study will yield an enormous boost to this kind of science. Accurate photometric redshifts and stellar masses for individual galaxies will enable a much cleaner selection. Such data will also allow HOD modelling through many redshift slices in the range of  $0 < z < 2$ , delivering a consistent and comprehensive description of the evolution in the halo–galaxy connection.

Additionally, there are dark matter convergence maps on the SSDF field derived from CMB lensing with the South Pole Telescope (Carlstrom et al. 2011). Cross-correlations in the SSDF field have already been performed by Bleem et al. (2012) and Holder et al. (2013) with an early IRAC galaxy catalogue and *Herschel* data, respectively. These studies focused on  $z \lesssim 1$  sources and measured a positive signal, although no halo model was fitted. In Martinez-Manso et al. (in preparation), we use the accurately calibrated IRAC catalogues in this paper to explore the cross-correlation of  $z \sim 1.5$  stellar mass-selected galaxies with dark matter maps. This study will offer a direct connection between these matter fields, and allow for an independent test of the halo model framework.

## ACKNOWLEDGEMENTS

We would like to thank Jean Coupon, Andrew Wetzel, Andrew Zentner, Andrey Kravtsov and Matthieu Béthermin for their helpful comments on this work.

## REFERENCES

Abbas U. et al., 2010, MNRAS, 406, 1306  
Akaike H., 1974, IEEE Trans. Autom. Control, 19, 716

Ashby M. L. N. et al., 2013a, ApJS, 209, 22  
Ashby M. L. N. et al., 2013b, ApJ, 769, 80  
Auger M. W., Treu T., Bolton A. S., Gavazzi R., Koopmans L. V. E., Marshall P. J., Moustakas L. A., Burles S., 2010, ApJ, 724, 511  
Baldry I. K., Glazebrook K., Brinkmann J., Ivezić Ž., Lupton R. H., Nichol R. C., Szalay A. S., 2004, ApJ, 600, 681  
Barro G. et al., 2011a, ApJS, 193, 13  
Barro G. et al., 2011b, ApJS, 193, 30  
Behroozi P. S., Conroy C., Wechsler R. H., 2010, ApJ, 717, 379  
Behroozi P. S., Wechsler R. H., Conroy C., 2013, ApJ, 770, 57 (B13)  
Bell E. F. et al., 2004, ApJ, 608, 752  
Benoist C., Maurogordato S., da Costa L. N., Cappi A., Schaeffer R., 1996, ApJ, 472, 452  
Benson A. J., Bower R. G., Frenk C. S., Lacey C. G., Baugh C. M., Cole S., 2003, ApJ, 599, 38  
Berlind A. A., Weinberg D. H., 2002, ApJ, 575, 587  
Berlind A. A. et al., 2003, ApJ, 593, 1  
Bertin E., Arnouts S., 1996, A&AS, 117, 393  
Beutler F. et al., 2013, MNRAS, 429, 3604  
Birnboim Y., Dekel A., 2003, MNRAS, 345, 349  
Blake C., Collister A., Lahav O., 2008, MNRAS, 385, 1257  
Bleem L. E. et al., 2012, ApJ, 753, L9  
Bolton A. S., Burles S., Koopmans L. V. E., Treu T., Gavazzi R., Moustakas L. A., Wayth R., Schlegel D. J., 2008, ApJ, 682, 964 -  
Bower R. G., Benson A. J., Malbon R., Helly J. C., Frenk C. S., Baugh C. M., Cole S., Lacey C. G., 2006, MNRAS, 370, 645  
Brodwin M., Lilly S. J., Porciani C., McCracken H. J., Le Fèvre O., Foucaud S., Crampton D., Mellier Y., 2006a, ApJS, 162, 20  
Brodwin M. et al., 2006b, ApJ, 651, 791  
Brodwin M. et al., 2008, ApJ, 687, L65  
Brown M. J. I. et al., 2008, ApJ, 682, 937  
Bruzual G., Charlot S., 2003, MNRAS, 344, 1000 (BC03)  
Bullock J. S., Kolatt T. S., Sigad Y., Somerville R. S., Kravtsov A. V., Klypin A. A., Primack J. R., Dekel A., 2001, MNRAS, 321, 559  
Cacciato M., van den Bosch F. C., More S., Li R., Mo H. J., Yang X., 2009, MNRAS, 394, 929  
Cacciato M., van den Bosch F. C., More S., Mo H., Yang X., 2013, MNRAS, 430, 767  
Calzetti D., Armus L., Bohlin R. C., Kinney A. L., Koornneef J., Storchi-Bergmann T., 2000, ApJ, 533, 682  
Carlstrom J. E. et al., 2011, PASP, 123, 568  
Chabrier G., 2003, PASP, 115, 763  
Coil A. L. et al., 2008, ApJ, 672, 153  
Coles P., 1993, MNRAS, 262, 1065  
Conroy C., Ostriker J. P., 2008, ApJ, 681, 151  
Conroy C., Wechsler R. H., 2009, ApJ, 696, 620  
Conroy C., Wechsler R. H., Kravtsov A. V., 2006, ApJ, 647, 201  
Conroy C., Gunn J. E., White M., 2009, ApJ, 699, 486  
Cooper M. C. et al., 2006, MNRAS, 370, 198  
Cooray A., Sheth R., 2002, Phys. Rep., 372, 1  
Coupon J. et al., 2012, A&A, 542, A5  
Cowie L. L., Songaila A., Hu E. M., Cohen J. G., 1996, AJ, 112, 839  
Croton D. J. et al., 2006, MNRAS, 365, 11  
Croton D. J., Gao L., White S. D. M., 2007, MNRAS, 374, 1303  
de la Torre S. et al., 2013, A&A, 557, A54  
Dekel A., Birnboim Y., 2006, MNRAS, 368, 2  
Donoso E., Yan L., Stern D., Assef R. J., 2014, ApJ, 789, 44  
Duffy A. R., Schaye J., Kay S. T., Dalla Vecchia C., 2008, MNRAS, 390, L64  
Dutton A. A., van den Bosch F. C., 2009, MNRAS, 396, 141  
Eisenhardt P. R. M. et al., 2008, ApJ, 684, 905  
Eisenstein D. J., Hu W., 1999, ApJ, 511, 5  
Fakhouri O., Ma C.-P., 2008, MNRAS, 386, 577  
Fakhouri O., Ma C.-P., Boylan-Kolchin M., 2010, MNRAS, 406, 2267  
Fioc M., Rocca-Volmerange B., 1997, A&A, 326, 950  
Foucaud S., Conselice C. J., Hartley W. G., Lane K. P., Bamford S. P., Almaini O., Bundy K., 2010, MNRAS, 406, 147  
Fry J. N., 1996, ApJ, 461, L65

- Fry J. N., Gaztanaga E., 1993, *ApJ*, 413, 447
- Gao L., Navarro J. F., Cole S., Frenk C. S., White S. D. M., Springel V., Jenkins A., Neto A. F., 2008, *MNRAS*, 387, 536
- Gavazzi R., Treu T., Rhodes J. D., Koopmans L. V. E., Bolton A. S., Burles S., Massey R. J., Moustakas L. A., 2007, *ApJ*, 667, 176
- Górski K. M., Hivon E., Banday A. J., Wandelt B. D., Hansen F. K., Reinecke M., Bartelmann M., 2005, *ApJ*, 622, 759
- Guo Q., White S., Li C., Boylan-Kolchin M., 2010, *MNRAS*, 404, 1111
- Hambly N. C. et al., 2001, *MNRAS*, 326, 1279
- Hamilton A. J. S., 1993, *ApJ*, 417, 19
- Hansen S. M., Sheldon E. S., Wechsler R. H., Koester B. P., 2009, *ApJ*, 699, 1333
- Hartley W. G. et al., 2013, *MNRAS*, 431, 3045
- Holder G. P. et al., 2013, *ApJ*, 771, L16
- Jullo E. et al., 2012, *ApJ*, 750, 37
- Juneau S. et al., 2005, *ApJ*, 619, L135
- Kaiser N., 1984, *ApJ*, 284, L9
- Kauffmann G., Nusser A., Steinmetz M., 1997, *MNRAS*, 286, 795
- Kauffmann G. et al., 2003, *MNRAS*, 341, 33
- Kauffmann G., White S. D. M., Heckman T. M., Ménard B., Brinchmann J., Charlot S., Tremonti C., Brinkmann J., 2004, *MNRAS*, 353, 713
- Kereš D., Katz N., Weinberg D. H., Davé R., 2005, *MNRAS*, 363, 2
- Kereš D., Katz N., Fardal M., Davé R., Weinberg D. H., 2009, *MNRAS*, 395, 160
- Kravtsov A. V., Berlind A. A., Wechsler R. H., Klypin A. A., Gottlöber S., Allgood B., Primack J. R., 2004, *ApJ*, 609, 35
- Kroupa P., 2001, *MNRAS*, 322, 231
- Landy S. D., Szalay A. S., 1993, *ApJ*, 412, 64
- Leauthaud A., Tinker J., Behroozi P. S., Busha M. T., Wechsler R. H., 2011, *ApJ*, 738, 45
- Leauthaud A. et al., 2012, *ApJ*, 744, 159
- Lewis A., Challinor A., Lasenby A., 2000, *ApJ*, 538, 473
- Limber D. N., 1953, *ApJ*, 117, 134
- Linder E. V., 2005, *Phys. Rev. D*, 72, 043529
- Lin Y.-T., Mohr J. J., 2004, *ApJ*, 617, 879
- Lin Y.-T., Mohr J. J., Stanford S. A., 2003, *ApJ*, 591, 749
- Ma C.-P., Fry J. N., 2000, *ApJ*, 543, 503
- McBride J., Fakhouri O., Ma C.-P., 2009, *MNRAS*, 398, 1858
- McCracken H. J., Ilbert O., Mellier Y., Bertin E., Guzzo L., Arnouts S., Le Fèvre O., Zamorani G., 2008, *A&A*, 479, 321
- Mancone C. L., Gonzalez A. H., 2012, *PASP*, 124, 606
- Mandelbaum R., Seljak U., Kauffmann G., Hirata C. M., Brinkmann J., 2006, *MNRAS*, 368, 715
- Maraston C., 2005, *MNRAS*, 362, 799 (M05)
- Marchesini D., van Dokkum P. G., Förster Schreiber N. M., Franx M., Labbé I., Wuyts S., 2009, *ApJ*, 701, 1765
- Matsuoka Y., Masaki S., Kawara K., Sugiyama N., 2011, *MNRAS*, 410, 548
- Meneux B. et al., 2008, *A&A*, 478, 299
- Meneux B. et al., 2009, *A&A*, 505, 463
- Mo H. J., White S. D. M., 1996, *MNRAS*, 282, 347
- More S., van den Bosch F. C., Cacciato M., Mo H. J., Yang X., Li R., 2009, *MNRAS*, 392, 801
- More S., van den Bosch F. C., Cacciato M., Skibba R., Mo H. J., Yang X., 2011, *MNRAS*, 410, 210
- Moscardini L., Coles P., Lucchin F., Matarrese S., 1998, *MNRAS*, 299, 95
- Mostek N., Coil A. L., Cooper M., Davis M., Newman J. A., Weiner B. J., 2013, *ApJ*, 767, 89
- Moster B. P., Somerville R. S., Maulbetsch C., van den Bosch F. C., Macciò A. V., Naab T., Oser L., 2010, *ApJ*, 710, 903 (M10)
- Moster B. P., Somerville R. S., Newman J. A., Rix H.-W., 2011, *ApJ*, 731, 113
- Moster B. P., Naab T., White S. D. M., 2013, *MNRAS*, 428, 3121 (M13)
- Murray N., Quataert E., Thompson T. A., 2005, *ApJ*, 618, 569
- Muzzin A. et al., 2013a, *ApJS*, 206, 8
- Muzzin A., Wilson G., Demarco R., Lidman C., Nantais J., Hoekstra H., Yee H. K. C., Rettura A., 2013b, *ApJ*, 767, 39
- Navarro J. F., Frenk C. S., White S. D. M., 1997, *ApJ*, 490, 493
- Neistein E., van den Bosch F. C., Dekel A., 2006, *MNRAS*, 372, 933
- Norberg P. et al., 2001, *MNRAS*, 328, 64
- Norberg P., Baugh C. M., Gaztañaga E., Croton D. J., 2009, *MNRAS*, 396, 19
- Papovich C., 2008, *ApJ*, 676, 206
- Peacock J. A., Smith R. E., 2000, *MNRAS*, 318, 1144
- Peebles P. J. E., 1980, *The Large-Scale Structure of the Universe*. Princeton Univ. Press, Princeton, NJ
- Pérez-González P. G. et al., 2008, *ApJ*, 675, 234
- Peterson J. R., Fabian A. C., 2006, *Phys. Rep.*, 427, 1
- Phillipps S., Fong R., Fall R. S. E. S. M., MacGillivray H. T., 1978, *MNRAS*, 182, 673
- Phleps S., Peacock J. A., Meisenheimer K., Wolf C., 2006, *A&A*, 457, 145
- Press W. H., Schechter P., 1974, *ApJ*, 187, 425
- Reddick R. M., Wechsler R. H., Tinker J. L., Behroozi P. S., 2013, *ApJ*, 771, 30
- Ross A. J., Percival W. J., Brunner R. J., 2010, *MNRAS*, 407, 420
- Schechter P., 1976, *ApJ*, 203, 297
- Scoccimarro R., Sheth R. K., Hui L., Jain B., 2001, *ApJ*, 546, 20
- Scranton R. et al., 2002, *ApJ*, 579, 48
- Seljak U., 2000, *MNRAS*, 318, 203
- Sheth R. K., Tormen G., 1999, *MNRAS*, 308, 119
- Sheth R. K., Mo H. J., Tormen G., 2001, *MNRAS*, 323, 1
- Simon P., Hettterscheidt M., Wolf C., Meisenheimer K., Hildebrandt H., Schneider P., Schirmer M., Erben T., 2009, *MNRAS*, 398, 807
- Skibba R. A. et al., 2014, *ApJ*, 784, 128
- Skrutskie M. F. et al., 2006, *AJ*, 131, 1163
- Smith R. E. et al., 2003, *MNRAS*, 341, 1311
- Stern D. et al., 2005, *ApJ*, 631, 163
- Tegmark M. et al., 2002, *ApJ*, 571, 191
- Tegmark M. et al., 2004, *ApJ*, 606, 702
- Tinker J. L., Wetzel A. R., 2010, *ApJ*, 719, 88
- Tinker J. L., Weinberg D. H., Zheng Z., Zehavi I., 2005, *ApJ*, 631, 41
- Tinker J., Kravtsov A. V., Klypin A., Abazajian K., Warren M., Yepes G., Gottlöber S., Holz D. E., 2008, *ApJ*, 688, 709
- Tinker J. L., Robertson B. E., Kravtsov A. V., Klypin A., Warren M. S., Yepes G., Gottlöber S., 2010, *ApJ*, 724, 878
- Tinker J. L. et al., 2012, *ApJ*, 745, 16
- Tinker J. L., Leauthaud A., Bundy K., George M. R., Behroozi P., Massey R., Rhodes J., Wechsler R. H., 2013, *ApJ*, 778, 93
- Vale A., Ostriker J. P., 2006, *MNRAS*, 371, 1173
- van de Voort F., Schaye J., Booth C. M., Haas M. R., Dalla Vecchia C., 2011a, *MNRAS*, 414, 2458
- van de Voort F., Schaye J., Booth C. M., Dalla Vecchia C., 2011b, *MNRAS*, 415, 2782
- van Dokkum P. G. et al., 2009, *PASP*, 121, 2
- Velander M., Kuijken K., Schrabback T., 2011, *MNRAS*, 412, 2665
- Vogelsberger M., Genel S., Sijacki D., Torrey P., Springel V., Hernquist L., 2013, *MNRAS*, 436, 3031
- Wake D. A. et al., 2011, *ApJ*, 728, 46
- Wang L. et al., 2013, *MNRAS*, 431, 648
- Watson D. F., Berlind A. A., Zentner A. R., 2011, *ApJ*, 738, 22
- Wechsler R. H., Bullock J. S., Primack J. R., Kravtsov A. V., Dekel A., 2002, *ApJ*, 568, 52
- Weinberg N. N., Kamionkowski M., 2003, *MNRAS*, 341, 251
- Weinberg D. H., Mortonson M. J., Eisenstein D. J., Hirata C., Riess A. G., Rozo E., 2013, *Phys. Rep.*, 530, 87
- Wetzel A. R., Cohn J. D., White M., 2009, *MNRAS*, 395, 1376
- Wetzel A. R., Tinker J. L., Conroy C., van den Bosch F. C., 2013, *MNRAS*, 432, 336
- White S. D. M., Davis M., Efstathiou G., Frenk C. S., 1987, *Nature*, 330, 451
- Yang X., Mo H. J., van den Bosch F. C., 2003, *MNRAS*, 339, 1057
- Yang X., Mo H. J., van den Bosch F. C., Zhang Y., Han J., 2012, *ApJ*, 752, 41 (Y12)
- Zehavi I. et al., 2005, *ApJ*, 630, 1
- Zehavi I. et al., 2011, *ApJ*, 736, 59
- Zehavi I., Patiri S., Zheng Z., 2012, *ApJ*, 746, 145



- Zentner A. R., Berlind A. A., Bullock J. S., Kravtsov A. V., Wechsler R. H., 2005, *ApJ*, 624, 505  
 Zheng Z., 2004, *ApJ*, 610, 61  
 Zheng Z. et al., 2005, *ApJ*, 633, 791  
 Zheng Z., Coil A. L., Zehavi I., 2007, *ApJ*, 667, 760  
 Zu Y., Zheng Z., Zhu G., Jing Y. P., 2008, *ApJ*, 686, 41

## APPENDIX A: PHOTOMETRIC SIMULATIONS

Our selection criteria are based on aperture photometry drawn from the Ashby et al. (2013a) 4.5  $\mu\text{m}$ -selected catalogue, but we used sources fainter than their  $5\sigma$  sensitivity threshold. For this reason, we carried out an independent analysis of the SSDF source extraction in order to estimate the completeness and photometric bias for the faintest sources. This was done by placing artificial sources of known brightness in representative SSDF mosaics (i.e. a pair of coextensive 3.6 and 4.5  $\mu\text{m}$  ‘tiles’ of size  $2 \times 1 \text{ deg}^2$ ; Ashby et al. 2013b), which were observed to the nominal survey depth. Then, we performed a detailed comparison between the resulting photometric measurements and the input brightnesses, as described below.

### A1 Simulation procedures

We began by generating point spread function (PSF) images to represent the artificial sources. This is consistent with high-resolution *Hubble Space Telescope*/wide field camera 3 observations showing that the vast majority of galaxies having magnitudes in our range of interest are point sources at IRAC resolution (fig. 25 of Ashby et al. 2013a). We first identified 18 point sources in the SSDF science mosaics and verified by visual inspection that they did not contain any artefacts or anomalies. These point sources were then scaled and median stacked at their centroid positions. The resulting PSF images were constructed with 41 by 41 0.6 arcsec pixels to match the spatial resolution of the SSDF science mosaics. The full widths at half-maximum (FWHMs) of these images were found to be 1.69 and 1.85 arcsec in the 3.6 and 4.5  $\mu\text{m}$  bands, respectively. These values are close to those measured for IRAC in single exposures, i.e. 1.62 and 1.77 arcsec.

The PSF images were then placed in the science mosaic. They were placed at random positions, but at a minimum distance from each other. This minimum distance varies linearly with the magnitude of the simulated source from 18 to 6 arcsec through  $[4.5] = 15 - 21$ . In addition, simulated sources were not allowed to fall within regions contaminated by stars brighter than  $K_s = 12$  mag. The size of the exclusion regions around these stars was determined following the method described in Section 2.

Outside the masked regions, 1500 simulated point sources having  $[4.5] = 15$  mag were added to random locations of the 4.5  $\mu\text{m}$  science mosaic. This number of simulated sources is low enough to avoid crowding and alterations in the photometric background. An equal number of sources were also put at identical locations in the 3.6  $\mu\text{m}$  science mosaic. The 3.6  $\mu\text{m}$  sources were set to have colours  $[3.6] - [4.5] = 0.7$ , appropriate for the sample selection described in Section 3.2. The modified science mosaics were then processed with SExtractor. This was also done on the original, unmodified science mosaic. Identical SExtractor parameter settings were used in all instances, following those presented in Ashby et al. (2013a). The process was repeated until a total of 80 000  $[4.5] = 15$  mag sources were detected and photometered. The simulations were then carried out in the same manner for input magnitudes in the range  $[4.5] = 15.5 - 21$  mag with steps of 0.5 mag. We used the resulting pairs of SExtractor catalogues to determine our

detection completeness and photometric bias. Specifically, we retrieved all catalogued sources found within 6 arcsec of the position of each simulated source in both the original and modified mosaics. This search radius was set empirically to encompass all possible shifts in the measured centroids of sources due to the distortion caused by the simulated source. Sources in the two catalogues were judged to match when they differed by less than 50 per cent in flux and were separated by less than half the PSF FWHM (0.9 arcsec). This left a number of non-matched sources from the original and modified mosaics:  $N_{\text{orig}}$  and  $N_{\text{mod}}$ , respectively. Then, a detection of the simulated source was determined if one of the following cases applied.

A:  $N_{\text{orig}} = 0, N_{\text{mod}} = 1$ . This is the most typical case, where only one source in the modified mosaic could not be matched to another in the original mosaic and was therefore identified as the simulated source.

B:  $N_{\text{orig}} = 0, N_{\text{mod}} > 1$ . As in A, all sources in the original mosaic were uniquely identified in the modified mosaic. However, there were a few sources in the latter with no counterpart. This happened because the simulated source was erroneously recovered by SExtractor as multiple sources. We identified the brightest one of these with the simulated source.

C:  $N_{\text{orig}} > 0, N_{\text{mod}} > N_{\text{orig}}$ . The local photometric influence of the simulated source caused a change in the position and flux of several sources in the modified mosaic. As a result, not all sources in the original mosaic found a match in the modified mosaic. This left at least two candidates in the modified mosaic to represent the simulated source. Consequently, one of them would correspond to an unmatched source in the original mosaic. To simplify the identification process, we restricted the selection of unmatched sources based on the input location of the simulated source: we considered the closest one and the closest two from the original and modified mosaics, respectively. If the source from the original mosaic was brighter than the simulated one, then the former ought to have shifted its position less than the latter. Thus, the source in the original mosaic was matched to the source in the modified mosaic that lay closest to it. Otherwise, the simulated source may have not shifted significantly due to the presence of the source in the original mosaic. In this case, the simulated source was identified with the nearest source in the modified mosaic.

D:  $N_{\text{mod}} > 0, N_{\text{orig}} \geq N_{\text{mod}}$ . In this situation, either a blend occurred or the simulated source distorted the local background in such a way that some sources in the original mosaic were not recovered in the modified mosaic. In the latter case, the candidate to represent the simulated source was the one found closest to it. A detection was judged if the candidate was the result of a blend between the simulated source and one or more in the original mosaic, provided that the simulated source dominated the total flux. This was confirmed when the flux ratio between the candidate and the simulated source was less than 2.

A direct product of these photometric simulations is the relation between input and 4 arcsec-aperture recovered magnitudes. For bright sources, this quantity should match the aperture correction, which represents the flux loss due to the finite aperture size. The 4.5  $\mu\text{m}$ -selected catalogue from Ashby et al. (2013a) includes aperture corrections of  $(\Delta_{[3.6]}, \Delta_{[4.5]}) = (0.33, 0.33)$ , derived from PSF growth curves. The values returned by our simulations for  $[4.5] = 15$  mag sources are  $(\Delta_{[3.6]}, \Delta_{[4.5]}) = (0.32, 0.36)$ . For consistency with the rest of our procedures, we undo the corrections applied in Ashby et al. (2013a) and use the values derived here.



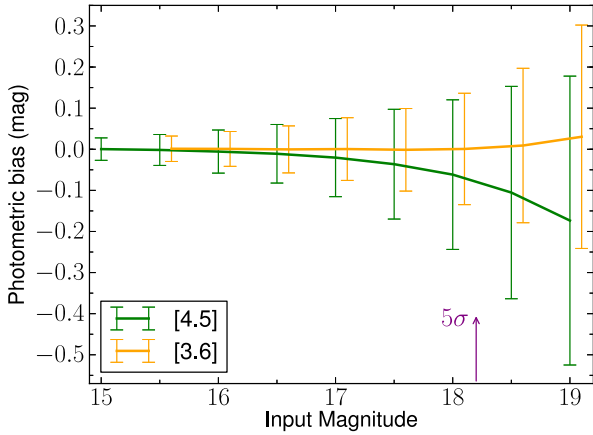

**Figure A1.** Photometric bias in the 3.6 and 4.5  $\mu\text{m}$  SSDF mosaics. The photometric bias was measured as the difference between the input magnitude and the output aperture-corrected magnitude, as derived from the simulations. The solid lines represent the median bias and error bars are one standard deviation. The arrow marks the  $5\sigma$  sensitivity level in [4.5] fluxes. The bias trend in [4.5] indicates an artificial brightening of sources towards faint input magnitudes, mainly caused by the contamination of flux from nearby objects and noise peaks. On the other hand, [3.6] extracted magnitudes become slightly fainter towards faint input magnitudes, which is due to positional shifts in the [4.5] selection aperture with respect to the real centroid of the source. The aperture-corrected magnitudes in the SSDF catalogue are combined with the photometric bias to obtain the final photometry (see the text).

## A2 Photometric bias

Due to the broad PSF, IRAC photometry suffered from a non-negligible level of source confusion. This caused the aperture flux to be contaminated by neighbouring sources and photometric background noise. In general, these effects were more significant for fainter sources. Thus, it was necessary to measure the average photometric bias as a function of magnitude, and use it to correct the full SSDF source catalogue. For this purpose, we employed the results from the simulations described in Appendix A1.

We calculated the photometric bias as the median difference between the input magnitude of the simulated sources and the recovered aperture-corrected magnitude, for those sources that were detected. The photometric biases for [4.5] and [3.6] (sources were selected in 4.5  $\mu\text{m}$ ) are shown in Fig. A1. This bias became progressively larger in [4.5] towards fainter magnitudes, in the sense that those sources had greater excess of flux due to contamination. An important contribution to the contamination in faint sources came from the background noise fluctuations. Sources falling on top of noise peaks became brighter, while those overlapping with noise troughs could avoid detection. Therefore, the net effect was an overestimation of the [4.5] flux in point sources, which became increasingly important towards the faint end.

In the case of the 3.6  $\mu\text{m}$  photometry, the photometric bias followed the opposite trend than seen at 4.5  $\mu\text{m}$ . This can be understood as being driven by the 4.5  $\mu\text{m}$  selection. As mentioned in Appendix A1, a faint source was likely to be measured in the 4.5  $\mu\text{m}$  mosaic at a shifted location from its true centre, which was caused by the addition of a nearby background flux spike in the 4.5  $\mu\text{m}$  mosaic and boosting the extracted flux value. However, within the same aperture in the 3.6  $\mu\text{m}$  mosaic, that flux spike was not present. We have verified these effects by visual inspection of the modified mosaics in the simulations. On average, the 3.6  $\mu\text{m}$  measurement did not add extra flux from the background and still lost input flux due

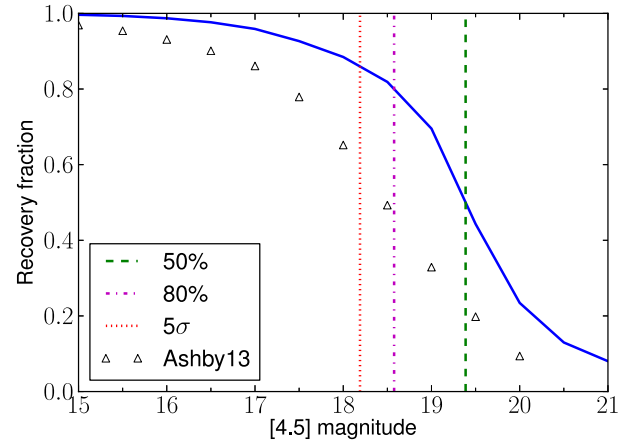

**Figure A2.** Recovered fraction of simulated sources as a function of input magnitude in [4.5]. The dash-dotted line at 18.19 represents the  $5\sigma$  level of photometric sensitivity. The dashed and dotted lines mark the points where the recovery fraction reaches 80 per cent at 18.58 and 50 per cent at 19.39, respectively. The open triangles represent the recovery fraction derived in Ashby et al. (2013a). We measure higher completeness than seen by Ashby et al. (2013a) because we employ a more complicated source identification procedure, which boosts the detections in complex cases (e.g. blends and positional shifts) that otherwise would be rejected.

to the aperture shift. This induced a photometric bias that slightly underestimated the 3.6  $\mu\text{m}$  aperture fluxes.

The detection algorithm in Appendix A1 already required some photometric bias correction to compare the measured and input fluxes in items C and D. Therefore, we ran a first pass of the simulation to compute a pre-correction, which was then used in the second pass to obtain the final results. In the first pass, we only considered the photometry of recovered sources via A and B, whose detection was independent of the photometry itself. In the second pass, we ran the simulation using the full detection algorithm, where we used the pre-corrections to perform comparison with input fluxes. In this algorithm, we did not use 4 arcsec apertures. Instead, 3 and 5 arcsec corrected [4.5] fluxes were used for C and D, respectively. The pre-corrections were computed in these apertures. We chose 3 arcsec because it was the aperture with the lowest photometric scatter, and 5 arcsec due to the larger sizes that source blends generally had.

## A3 Completeness

With the results from the mock source simulations described in Appendix A1, we can compute the detection fraction as a function of input 4.5  $\mu\text{m}$  magnitude. This photometric completeness is shown in Fig. A2, reaching 80 per cent at 18.58 and 50 per cent at 19.39. We obtain significantly higher values than Ashby et al. (2013a), which is due to the different procedures used in the detection algorithm. The procedure used in this work considers a larger number of cases where a source may be detected. This includes the positional shifts  $>1$  arcsec in the measured photometry and the flux variations  $>0.5$  mag due to source confusion (see items B–D in Appendix A1).

The scatter in the extracted 4.5  $\mu\text{m}$  fluxes allows us to determine the photometric sensitivity. The  $5\sigma$  limit is [4.5] = 18.19, very similar to the level of 18.2 found in Ashby et al. (2013a).

## APPENDIX B: COSMOS VERSUS EGS AS REFERENCE SAMPLES

All the procedures presented so far have used COSMOS data as the reference sample, but we have also performed the same calculations with EGS. The comparison between these sets of results provides a sense of the systematic uncertainty associated with the choice of the reference survey. The redshift distributions, number densities and stellar masses present some differences, but we show below that these variations do not qualitatively alter our results.

First, we present a brief description of some of the relevant aspects of the EGS and COSMOS data sets.

(i) EGS: Barro et al. (2011a) select sources in IRAC with 4 arcsec apertures and reach  $S/N = 5\sigma$  at  $\sim 21$  mag. The survey covers  $0.48 \text{ deg}^2$  and photometric redshifts are provided with an accuracy of  $\delta z/(1+z) = 0.034$ . The IRAC photometry in EGS is almost 3 mag deeper than SSDF, reaching a higher source completeness throughout the range of magnitudes considered in this work ( $[4.5] < 18.6$ ). Likewise, the higher depth in EGS makes it robust against the photometric bias that affects the SSDF (see Appendix A2). Barro et al. (2011a) apply aperture corrections of  $(\Delta_{[3.6]}, \Delta_{[4.5]}) = (0.32, 0.36)$  derived from PSF growth curves. These values are exactly the same as our photometric corrections in the bright limit (see Fig. A1).

(ii) COSMOS: Muzzin et al. (2013a) explain that images from optical+near-infrared bands are PSF matched and source selection is done in the  $K_s$  band with 2.1 arcsec colour apertures. The  $K_s$ -band images are then used as high-resolution templates in a fitting procedure to deblend confused IRAC sources. The  $4.5 \text{ }\mu\text{m}$  photometry reaches  $S/N = 5\sigma$  at  $\sim 20$ , which is 2 mag deeper than the SSDF and therefore completeness in COSMOS is not a concern. The survey region covers  $1.62 \text{ deg}^2$  and the photometric redshifts are accurate to  $\delta z/(1+z) = 0.013$ . The aperture corrections are very different from the schemes used in EGS and by us in the SSDF. From PSF growth curves, they derive the correction to the  $K_s$  AUTO flux. The ratio between this corrected AUTO flux and the 2.1 arcsec flux in  $K_s$  is used as the aperture correction for all other bands.

In COSMOS, the IRAC aperture-flux corrections factors are  $\sim 50$  per cent lower on average than in EGS, taking into account the different aperture sizes. In other words, for the same population of galaxies, EGS measures a higher IRAC apparent flux than COSMOS. Surprisingly, this has a very little impact in the stellar masses for a given luminosity, where the difference is just an offset of  $\sim 0.07$  dex between these catalogues.

In Fig. B1, we compare the HOD-derived quantities  $b_g^{\text{eff}}$ ,  $M_1/M_{\text{min}}$  and  $f_{\text{sat}}$  for EGS and COSMOS. This figure demonstrates the agreement between these data sets. Note that the redshift distributions used to model the ACFs are generated from these reference catalogues, as described in Section 3.1. Regarding the SHMR, the peak using COSMOS was found at  $\log M_{\text{peak}} = 12.44 \pm 0.08$ , whereas it is  $12.35 \pm 0.10$  for EGS. These measurements are mutually consistent given their uncertainties. In addition, the slopes of the relation are also practically the same.

## APPENDIX C: INTEGRAL CONSTRAINT

The estimators of the ACF (such as the one in equation 15) suffer from a well-known systematic suppression due to the finite size of the survey, called the *integral constraint* (Peebles 1980). By

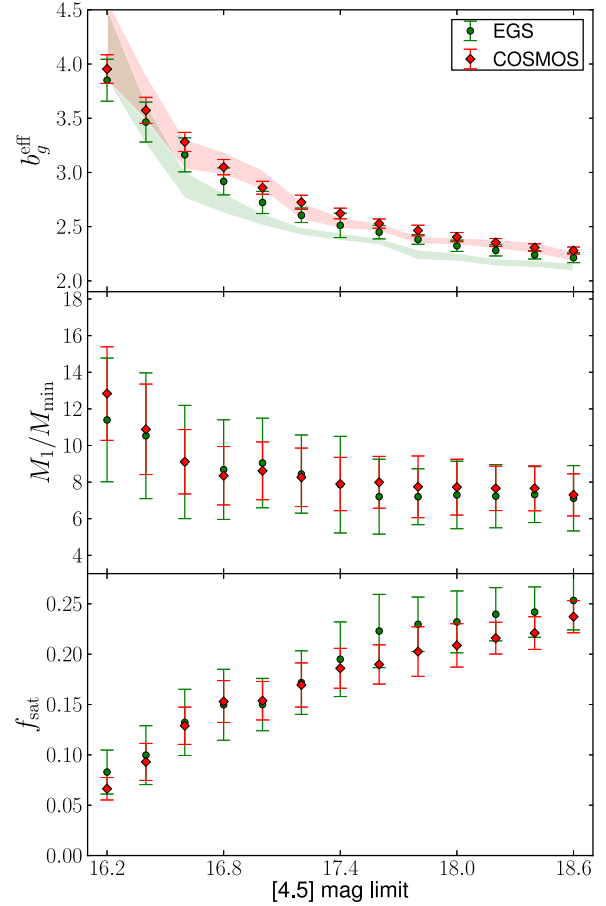

**Figure B1.** Results from the HOD fits to the SSDF data using COSMOS and EGS as reference catalogues. Each point denotes a sample defined by a limiting apparent magnitude threshold. In the top panel, the shaded regions represent the  $\pm 1\sigma$  interval of direct large-scale bias fits. These are consistent with the HOD bias. There is an excellent agreement between both data sets in all panels.

construction, the estimator requires the probability to be normalized over the survey area. This means that

$$\int_{\text{survey}} \hat{\omega}(\theta) \text{d}\Omega = 0. \quad (\text{C1})$$

However, the true  $\omega(\theta)$  is normalized with the entire sky, so that

$$\oint_{\text{sky}} \omega(\theta) \text{d}\Omega = 0. \quad (\text{C2})$$

Equation (C1) shows that  $\hat{\omega}(\theta)$  will be different from  $\omega(\theta)$  whenever the survey is a fraction of the sky. In order to calculate the correction  $\hat{\omega}(\theta) \rightarrow \omega(\theta)$  for the SSDF ACFs, we run simulations with mock realizations of the galaxy field in the survey region. These are generated with some known  $\omega(\theta)$ , which is then compared to the measured estimator  $\hat{\omega}(\theta)$ . We adopt the power spectrum of dark matter  $P(k, z=0)$  and a redshift selection function equal to that of our main galaxy sample,  $\phi^{\text{mock}}(z) = \phi_{\text{cut}}^{12}(z) / \int \phi_{\text{cut}}^{12}(z') \text{d}z'$  (see Fig. 5). Following Tegmark et al. (2002), the angular power spectrum is computed as

$$C_l^{\text{mock}} = \frac{2}{\pi} \int_0^\infty \text{d}k k^2 P(k) \left[ \int_0^\infty \text{d}z \phi^{\text{mock}}(z) G(z) j_l(\chi(z)k) \right]^2, \quad (\text{C3})$$

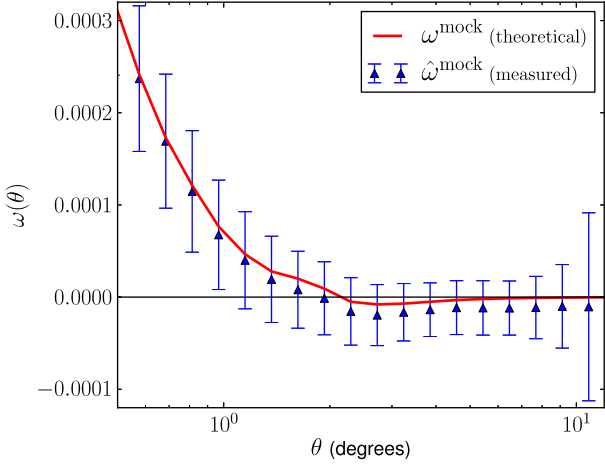

**Figure C1.** Red: theoretical ACF of dark matter following a redshift distribution as in Fig. 5. Blue: measured ACF of mock galaxy fields within the SSDF region. Their parent distribution follows the same statistics as the theoretical curve. Error bars represent one standard deviation. The suppression in the measured curve is due to the normalization of the mean galaxy density within a survey region that is a fraction of the total sky.

where  $G(z)$  is the growth factor,  $\chi(z)$  the radial comoving distance and  $j_l$  the spherical Bessel function. We use the routine SYNFAST in the HEALPIX<sup>2</sup> distribution (Górski et al. 2005) to produce 1000 different sky realizations drawn from this angular power spectrum. These overdensity maps are cropped to the SSDF mask and renormalized within that region. A pixelized version of the estimator in equation (15) (see equation 18 in Scranton et al. 2002) is then employed to calculate the ACF. The theoretical expression of this statistic takes the form of

$$\omega^{\text{mock}}(\theta) = \sum_l \frac{(2l+1)}{4\pi} C_l^{\text{mock}} P_l(\cos\theta), \quad (\text{C4})$$

where  $P_l$  are the Legendre polynomials. Fig. C1 shows this theoretical expectation along with the measured statistic from the mock simulations. We define the difference between both curves as  $\Delta(\theta)$ . In general, this quantity should scale with the overall bias of the ACF being corrected. Therefore, we correct the galaxy ACFs as  $\omega^{\text{gal}}(\theta) = \hat{\omega}^{\text{gal}}(\theta) + \gamma \Delta(\theta)$ . Here,  $\gamma$  is a relative bias factor determined by the quotient  $\gamma = \hat{\omega}^{\text{gal}}/\omega^{\text{mock}}$  at  $\theta = 0.5$ , where  $\Delta \simeq 0$ . For our largest galaxy sample, the large-scale correction is  $\sim 10^{-4}$ . In all samples, the correction is considerably smaller than the errors at all scales and it does not play a significant role in the results presented in this study.

#### APPENDIX D: THE HALO MODEL

We use the halo mass function from Tinker et al. (2010), which considers spherically collapsed haloes with an average density 200 times greater than the critical density of the Universe. It takes the form

$$\frac{dn(M, z)}{dM} = \frac{\bar{\rho}_m}{M} f(\nu) d\nu, \quad (\text{D1})$$

where  $\bar{\rho}_m$  is the comoving average matter density of the Universe. The function  $f(\nu)$  is empirically determined by simulations in Tinker et al. (2010) and parametrized with the variable

$$\nu(M, z) = \frac{\delta_c(z)}{\sigma(M, z)}. \quad (\text{D2})$$

Here,  $\delta_c$  is the critical density for halo collapse (Press & Schechter 1974) for which we adopt the redshift evolution from Weinberg & Kamionkowski (2003)

$$\delta_c(z) = \frac{3}{20} (12\pi)^{2/3} (1 + 0.131 \log \Omega_m(z)), \quad (\text{D3})$$

with the universal fraction of matter evolving as

$$\Omega_m(z) = \left[ 1 + \frac{\Omega_\Lambda}{\Omega_{m0}(1+z)^3} \right]^{-1}. \quad (\text{D4})$$

The rms of the matter density field inside spheres of  $R = (3M/4\pi\bar{\rho}_m)^{1/3}$  is

$$\sigma^2(M, z) = G^2(z) \int_0^\infty dk \frac{k^2 P_{\text{lin}}(k)}{2\pi^2} W^2(kR), \quad (\text{D5})$$

where  $P_{\text{lin}}$  is the linear matter power spectrum today,  $W(x) = (3/x^3)(\sin x - x \cos x)$  and the growth factor is (Linder 2005; Weinberg 2012)

$$G(z) = \exp \left[ - \int_0^z \frac{dz'}{1+z'} \Omega_m(z')^{-0.55} \right]. \quad (\text{D6})$$

With the mass function we can write the predicted total number density of galaxies as

$$n_g = \int_{M_{\text{low}}}^{M_{\text{high}}} dM \frac{dn}{dM}(M) N(M), \quad (\text{D7})$$

where the integration limits are set hereafter by  $M_{\text{low}} = 10^8 M_\odot$  and  $M_{\text{high}} = 10^{16} M_\odot$ . The NFW halo density profile is

$$\rho_h(M, r) = \frac{\rho_s}{(r/r_s)(1+r/r_s)^2}. \quad (\text{D8})$$

Here,  $r_s = r_{200}/c$ , where  $r_{200} = [3M/(4\pi 200\bar{\rho}_m)]^{1/3}$  and the concentration parameter is given by Duffy et al. (2008)

$$c(M, z) = A(M/M_{\text{pivot}})^B (1+z)^C, \quad (\text{D9})$$

with  $A = 6.71$ ,  $B = -.091$ ,  $C = -.44$  and  $M_{\text{pivot}} = 2.86 \times 10^{12} M_\odot$ . We have also tried other concentration models from the literature (Bullock et al. 2001; Gao et al. 2008) and explored variations in the normalization. We find the ACFs to be relatively insensitive to these changes within the angular scales probed by our data. The central density  $\rho_s$  can be determined through

$$M = \int_0^{r_{200}} dr 4\pi r^2 \rho_h(M, r) \quad (\text{D10})$$

so that

$$\rho_s = \frac{200\bar{\rho}_m c^3}{3 [\ln(1+c) - c/(1+c)]}. \quad (\text{D11})$$

For the large-scale halo bias, we adopt the prescription from Sheth, Mo & Tormen (2001)

$$b_h(M, z) = b_h(\nu) = 1 + \frac{1}{\delta_c \sqrt{a}} \left[ \sqrt{a} (a\nu^2) + \sqrt{ab} (a\nu^2)^{1-c} - \frac{(a\nu^2)^c}{(a\nu^2)^c + b(1-c)(1-c/2)} \right], \quad (\text{D12})$$

<sup>2</sup> <http://healpix.sf.net>

with the updated parameters from Tinker et al. (2005)  $a = 0.707$ ,  $b = 0.35$  and  $c = 0.8$ . Under the halo definition we use (spherical overdensity; Tinker et al. 2008), haloes are allowed to overlap as long as the centre of one halo is not contained within the radius of another halo. The full scale-dependent bias is given by Tinker et al. (2012)

$$b_h(M, z, r) = b_h(M, z) \frac{[1 + 1.17\xi_m(R^*, z)]^{1.49}}{[1 + 0.69\xi_m(R^*, z)]^{2.09}}, \quad (\text{D13})$$

with

$$R^* = \begin{cases} r & \text{if } r \geq 2R_{\text{halo}} \\ 2R_{\text{halo}} & \text{if } r < 2R_{\text{halo}}, \end{cases} \quad (\text{D14})$$

which sets a constant bias in the regime where haloes overlap. The non-linear matter power spectrum is obtained with the CAMB package (Lewis, Challinor & Lasenby 2000). It transforms to the correlation function as

$$\xi(r) = \frac{1}{2\pi^2} \int_0^\infty dk k^2 P(k) \frac{\text{sinc}kr}{kr}. \quad (\text{D15})$$

Since the virialized regime of satellites within haloes will be different from the large-scale interaction between central galaxies, it is convenient to express the SCF as a sum of two terms:

$$\xi_g(r) = 1 + \xi_g^{\text{1h}}(r) + \xi_g^{\text{2h}}(r). \quad (\text{D16})$$

The one-halo term is highly non-linear and dominates at scales smaller than the average halo size (i.e. virial radius), while the two-halo term becomes more important at large scales. Furthermore, the one-halo term can be separated into central–satellite and satellite–satellite parts. In the former, the correlation follows the form of an NFW density weighted by spherical volume, since by construction satellites are distributed according to that profile from the central galaxy. In the latter, the satellite–satellite correlation follows the form of an NFW profile (still representing the distribution of satellites from the central galaxy) convolved with itself. In the case of the two-halo term, the correlation traces the convolution between  $\xi_m$  and density profiles of different haloes. Given the many convolutions, it is better to work in Fourier space, where all these become simple products. Thus, equation (D16) can be rewritten as

$$P_g(k) = [P_g^{\text{cs}}(k) + P_g^{\text{ss}}(k)]^{\text{1h}} + P_g^{\text{2h}}(k). \quad (\text{D17})$$

The explicit form of the one-halo terms is

$$P_g^{\text{cs}}(k, z) = \frac{2}{n_g^2} \int_{M_{\text{low}}}^{M_{\text{high}}} dM N_s(M) N_c(M) \frac{dn}{dM}(M, z) u(k, M, z), \quad (\text{D18})$$

$$P_g^{\text{ss}}(k, z) = \frac{1}{n_g^2} \int_{M_{\text{low}}}^{M_{\text{high}}} dM N_s(M) N_c(M) \frac{dn}{dM}(M, z) u^2(k, M, z), \quad (\text{D19})$$

where  $u$  is the Fourier transform of an NFW profile (Cooray & Sheth 2002). For the two-halo term, we must not consider overlapping haloes if one of their radii contains the centre of the other. This is done by adopting halo exclusion (Zheng 2004), where we set the minimum separation allowed for two haloes to  $d = \max(R_{\text{halo1}}, R_{\text{halo2}})$  (Leauthaud et al. 2011). This implies that measuring halo correlations at distances smaller than  $r$ , we can integrate all possible pairs where the individual radii are bound to an upper limit  $R_{\text{lim}} = r$ .

The two-halo term thus reads

$$P_g^{\text{2h}}(k, r, z) = P_m(k, z) \left[ \frac{1}{n_g'(r)^2} \int_{M_{\text{low}}}^{M_{\text{lim}}(r)} dM N(M) \times \frac{dn}{dM}(M, z) b_h(M, r, z) u^2(k, M, z) \right]^2, \quad (\text{D20})$$

where the scale-dependent halo bias is introduced and  $M_{\text{lim}}(r) = M(r = r_{200})$  enforces halo exclusion. This integration limit restricts the average density of the galaxies considered (Tinker et al. 2005):

$$n_g'(r) = \int_{M_{\text{low}}}^{M_{\text{lim}}(r)} dM \frac{dn}{dM}(M) N(M), \quad (\text{D21})$$

compared to the total  $n_g$  in equation (D7). After Fourier transforming  $P_g^{\text{2h}}$  into  $\xi_g^{\text{2h}'}$ , the probability function needs to be suppressed to account for the missing galaxies in  $n_g'$  as

$$1 + \xi_g^{\text{2h}}(r, z) = \left( \frac{n_g'(r)}{n_g} \right)^2 [1 + \xi_g^{\text{2h}'}(r, z)]. \quad (\text{D22})$$

Adding the one-halo terms from equations (D18) and (D19) completes the HOD description of our model.

## APPENDIX E: LOW-REDSHIFT BUMP

Low- $z$  galaxies have an important contribution to the redshift distribution in our brightest galaxy sample,  $[4.5] < 16.2$ , as shown in Fig. 5. In this section, we use the optical Super Cosmos survey data (Hamby et al. 2001) to match and remove these sources from the SSDF catalogue and evaluate how this changes the HOD results from Section 5. This is intended to serve as a consistency check for the methods used so far to model the low-redshift galaxy clustering.

Super Cosmos (hereafter SC) is a full sky survey produced from digitized photographic plates in the  $B$ ,  $R$  and  $I$  bands, with a typical depth of  $R(AB) \sim 21$  mag. We retrieved from the Super Cosmos Science Archive<sup>3</sup> all sources in the SSDF footprint with detection in  $R$  and at least one other band. We chose  $R$  as the main optical band because, in combination with our infrared cuts, it is particularly effective in selecting  $z < 1$  galaxies at  $R(AB) \lesssim 22.5$  (Papovich 2008). We removed from the SSDF catalogue all the sources in the SC sample that matched within a search radius of 1 arcsec. The SSDF clustering computation and modelling followed the same procedures described through Sections 3–6, except for a modification of equation (2). This equation describes the SSDF redshift distribution as a sum of contributions from the individual galaxies in the control sample, given a particular [3.6] and [4.5] selection. The modification consists of including a weight factor to each individual contribution based on the galaxy's  $R$ -band magnitude. This weight,  $\mathcal{W}(R) \in [0, 1]$ , should represent the probability of a galaxy in the SSDF to be undetected in SC. We defined this probability as  $\mathcal{W}(R) = 1 - \mathcal{U}(R)$ , where  $\mathcal{U}(R)$  is the  $R$ -band completeness in SC. We estimated the completeness directly from the distribution of  $R$  magnitudes from the SC catalogue, shown in the lower panel of Fig. E1. This distribution,  $\mathcal{D}(R)$ , was assumed to obey a power law (Schechter 1976) that is suppressed at the faint end by the completeness function

$$\mathcal{D}(R) = d_0 R^{d_1} \mathcal{U}(R). \quad (\text{E1})$$

<sup>3</sup> [surveys.roe.ac.uk/ssa/](https://surveys.roe.ac.uk/ssa/)



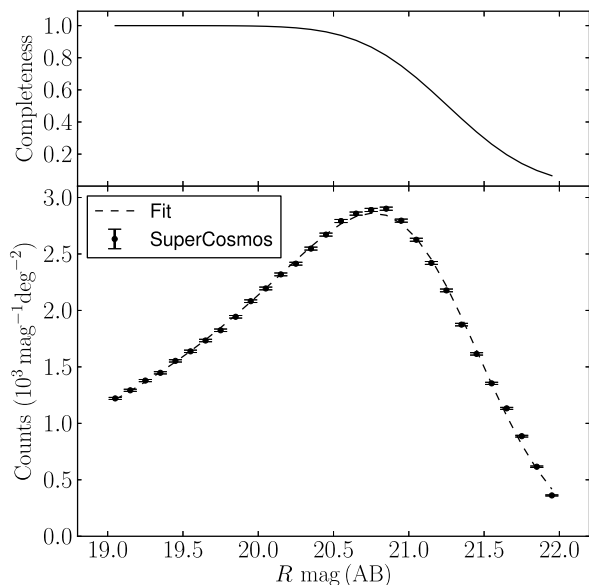

**Figure E1.** Distribution of  $R$ -band magnitudes from SC sources in the SSDF region (points). We fit the data with a function consisting of a power law times an error function (dashed line). The best-fitting error function is displayed in the top panel and represents the  $R$ -band photometric completeness of the SC sample.

Here,  $d_0$  and  $d_1$  are the power-law coefficients and

$$\mathcal{U}(R) = \frac{1}{2} (1 - \text{Erf}(s(R - R_0))), \quad (\text{E2})$$

$$\text{Erf}(y) = \frac{2}{\sqrt{\pi}} \int_0^y e^{-t^2} dt, \quad (\text{E3})$$

where  $R_0$  and  $s$  are parameters that control the shape of the error function. We fit  $\mathcal{D}(R; d_0, d_1, R_0, s)$  to the SC data. This is shown in Fig. E1, where the upper panel represents the corresponding  $\mathcal{U}(R)$  component.

The application of  $\mathcal{W}(R)$  to the galaxies in the control sample produces a strong suppression of the low-redshift contribution. This can be seen in Fig. E2 for the  $[4.5] < 16.2$  subsample. Compared to the fiducial distribution derived in Section 3.2, the removal of SC sources eliminates almost completely the bump at  $z \sim 0.3$ . The comoving number density at  $z = 1.5$  (equation 6) increases only 7 per cent. The HOD fit suffers a decrease in  $M_{\min}$  of 0.02 dex and an increase in  $M_1$  of 0.05 dex. For subsamples with thresholds fainter than  $[4.5] = 16.2$ , these variations become even smaller. Overall, the impact of removing SC data on the results presented in this paper is negligible. This provides solid support to the modelling of the low-redshift galaxy clustering described in Sections 3–5.

We have not used the analysis from this section to derive the main results of the paper because there are potential systematic effects in the SC catalogue that we have not thoroughly inspected. For instance, the SC photometry suffers from differential coverage depth across the field, which could cause an artificial contribution to the clustering. In addition, we do not have a complete statistical description of the large photometric  $R$ -band errors present in SC. An improved treatment in this analysis would entail the use of such errors to deconvolve the SC distribution of  $R$  magnitudes, in order

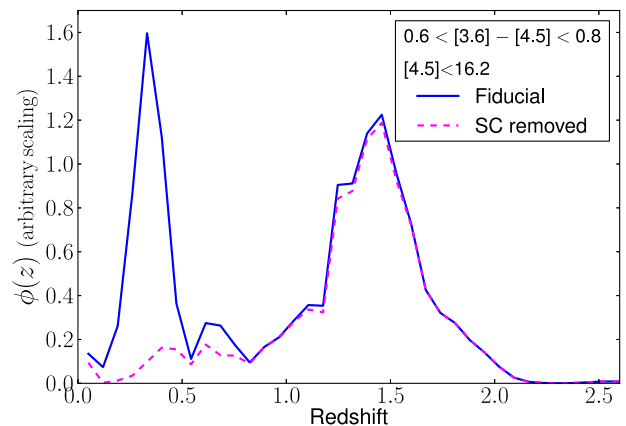

**Figure E2.** Redshift distribution of our brightest galaxy sample obtained from the COSMOS-based control sample. The solid line represents the fiducial distribution as derived in Section 3, which includes sources selected only with IRAC data. The dashed line shows the simulated effect of removing all sources with  $R$ -band detections in SC. This optical selection is very effective at suppressing the low-redshift bump.

to be consistent with the high photometric quality of the control sample.

## APPENDIX F: NO PRIOR ON NUMBER DENSITY

In the fitting procedure, we have fixed all basic HOD parameters except  $M'_1$ , and used galaxy number densities obtained through a combination of the SSDF observed number counts and the control sample. Here, we check what happens if we leave all those parameters to vary freely and discard any prior information on the number density. Thus,  $n_g$  becomes a derived quantity through equation (D7). We still need to use the normalized redshift distributions from the control sample, however. For the sake of clarity in this section, we will call the fiducial fit of this paper *model A* (one-parameter fit,  $n_g$  fixed), and the unconstrained one *model B* (five-parameter fit,  $n_g$  as derived quantity).

The goodness of fit,  $\chi^2_v$ , remains on average the same between models *A* and *B*, which points to the latter not really being statistically favoured. The  $b_g$ ,  $M_1/M_{\min}$  and  $f_{\text{sat}}$  relations also do not change appreciably, as shown in Fig. F1. This implies that: (1) the observed clustering is able to correctly reproduce the measured galaxy number density, which is a free parameter in *B*, and (2) the values of the fixed parameters in *A* are reasonable choices. On average, the changes in the derived parameters and  $n_g$  are  $\lesssim 20$  per cent, which supports the validity of the halo occupation model. We choose *A* as the fiducial model because the relation between the derived parameters and sample luminosity is more monotonic than in *B*. The latter shows roughly the same average trends but with a stronger level of stochasticity. In essence, there would be no substantial information gain by adopting *B* instead of *A*. In addition, *A* includes the observed number density, which places an important constraint on the HOD model. The inferred densities from equation (6) do contain some uncertainty since they are partially derived from the control sample, but we believe that using them produces a more physically consistent HOD model.

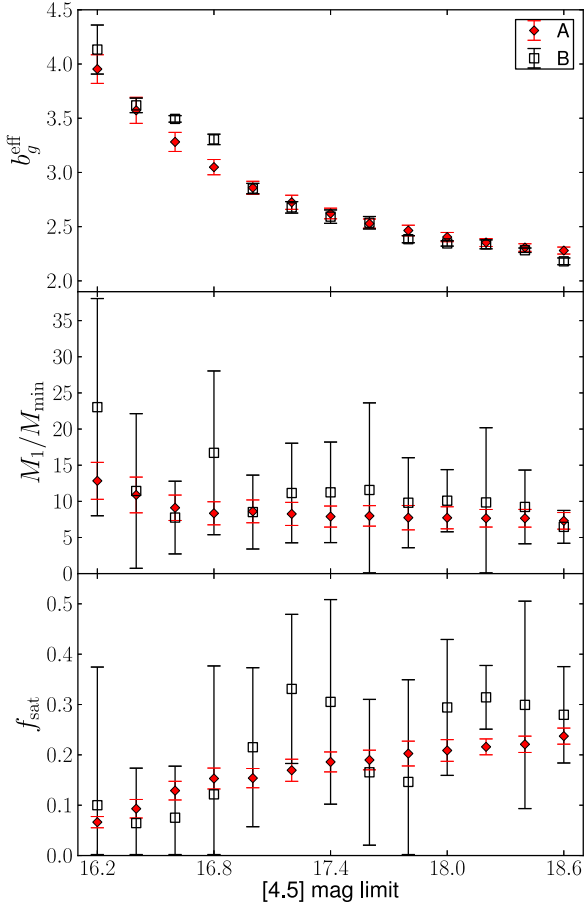

**Figure F1.** Results from the HOD fits to the SSDF data using the COSMOS reference catalogue. Models A and B refer to fits using one and five free parameters, respectively (see the text). The galaxy number density is fixed in A to the observed number counts, but it is left as a free parameter in B. Both models are fully consistent, which implies that the observed clustering can reproduce the correct number density and that the values for the fixed parameters in A are reasonable. We choose A as our fiducial model since it yields a more monotonic behaviour between the derived parameters and the sample luminosity, as expected.

When performing a fit of the SHMR with results from B, the errors become large enough to be consistent at about  $1\sigma$  level with A. For example, in the M13 parametrization, for A we obtained  $\log M_{\text{peak}} = 12.44 \pm 0.08$ ,  $\beta = 1.64 \pm 0.09$  and  $\gamma = 0.60 \pm 0.02$ , while for B these become  $\log M_{\text{peak}} = 12.43 \pm 0.09$ ,  $\beta = 2.14 \pm 0.98$  and  $\gamma = 0.50 \pm 0.11$ . We obtain similar values when using EGS as the reference catalogue (see Appendix B).

This paper has been typeset from a  $\text{\TeX}/\text{\LaTeX}$  file prepared by the author.
